# Supplementary material for: Predictors of maternal and neonatal complications in women with severe valvular heart disease during pregnancy in Tunisia: a retrospective cohort study
Source: Springer Nature journal article supplement (doi:10.1186/s12884-021-04259-6), 2021-12-01
Supplement: MOESM1 [file 19942772]

| numeros | ficl       | datenaissa | niveau | inte       | profession | origine     | annee | gross | tranche_age | age_gros | gross | gross_prog |
|---------|------------|------------|--------|------------|------------|-------------|-------|-------|-------------|----------|-------|------------|
| 1       |            | 14-juil-72 | 2,00   | faf        |            | gabes       | 2010  | 5,00  | 38,00       |          | 2,00  |            |
| 11      | #####      |            | 2,00   | faf        |            | kerkna      | 2015  | 5,00  | 39,00       |          | 1,00  |            |
| 61      | #####      |            | 2,00   | faf        |            | sfax        | 2012  | 4,00  | 35,00       |          | 2,00  |            |
| 2       | #####      |            | 3,00   | faf        |            | gabes       | 2013  | 4,00  | 31,00       |          | 2,00  |            |
| 65      | 13-oct-87  |            | 2,00   | faf        |            | gabes       | 2017  | 3,00  | 30,00       |          | 1,00  |            |
| 3       | #####      |            | 2,00   | faf        |            |             | 2014  | 3,00  | 29,00       |          | 1,00  |            |
| 4       | 16-juil-81 |            | 2,00   | faf        |            | mahres      | 2016  | 4,00  | 35,00       |          | 2,00  |            |
| 6       | #####      |            | 2,00   | faf        |            | sfax        | 2011  | 2,00  | 25,00       |          | 1,00  |            |
| 52      | 03-oct-87  |            | 3,00   | faf        |            | sfax        | 2013  | 3,00  | 26,00       |          | 2,00  |            |
| 7       | 29-juin-88 |            | 3,00   | faf        |            | rgueb       | 2013  | 2,00  | 25,00       |          | 1,00  |            |
| 46      | #####      |            | 4,00   | professeur |            | sidi bouzid | 2017  | 5,00  | 37,00       |          | 2,00  |            |
| 8       | #####      |            | 2,00   | faf        |            | sidibouzid  | 2013  | 5,00  | 39,00       |          | 2,00  |            |
| 45      | 15-oct-86  |            | 3,00   | faf        |            | sfax        | 2017  | 4,00  | 31,00       |          | 1,00  |            |
| 9       | #####      |            | 1,00   | faf        |            |             | 2010  | 6,00  | 41,00       |          | 2,00  |            |
| 10      | 27-oct-85  |            | 3,00   | faf        |            | sfax        | 2011  | 4,00  | 26,00       |          | 2,00  |            |
| 12      | 31-oct-86  |            | 3,00   | faf        |            | Jerba       | 2015  | 3,00  | 29,00       |          | 1,00  |            |
| 60      | #####      |            | 4,00   | étudiante  |            | sfax        | 2013  | 1,00  | 20,00       |          | 1,00  |            |
| 41      | #####      |            | 2,00   | faf        |            | jbeniena    | 2013  | 6,00  | 42,00       |          | 2,00  |            |
| 49      | #####      |            | 2,00   | faf        |            | mednine     | 2015  | 3,00  | 28,00       |          | 1,00  |            |
| 59      | #####      |            | 3,00   | professeur |            | sfax        | 2017  | 4,00  | 33,00       |          | 2,00  |            |
| 64      | 07-juil-74 |            | 3,00   | faf        |            | sidibouzid  | 2017  | 6,00  | 43,00       |          | 2,00  |            |
| 14      | #####      |            | 2,00   | faf        |            | hencha      | 2015  | 5,00  | 36,00       |          | 2,00  |            |
| 15      | #####      |            | 2,00   | faf        |            | sidibouzid  | 2013  | 5,00  | 36,00       |          | 1,00  |            |
| 16      | #####      |            | 3,00   | fonctionna |            | sfax        | 2010  | 3,00  | 30,00       |          | 1,00  |            |
| 17      | #####      |            | 3,00   | fonctionna |            | sfax        | 2014  | 4,00  | 34,00       |          | 1,00  |            |
| 18      | 05-mai-82  |            | 2,00   | faf        |            | jbeniana    | 2016  | 4,00  | 34,00       |          | 2,00  |            |
| 19      | #####      |            | 3,00   | faf        |            | sfax        | 2015  | 4,00  | 33,00       |          | 2,00  |            |
| 54      | 25-oct-80  |            | 3,00   | faf        |            | kasserine   | 2012  | 4,00  | 32,00       |          | 1,00  |            |
| 20      | 12-mai-73  |            | 2,00   | faf        |            |             | 2012  | 3,00  | 29,00       |          | 1,00  |            |
| 21      | #####      |            | 2,00   | faf        |            | hencha      | 2013  | 6,00  | 43,00       |          | 2,00  |            |
| 62      | #####      |            | 2,00   | faf        |            | sfax        | 2009  | 5,00  | 37,00       |          | 2,00  |            |
| 22      | #####      |            | 2,00   | faf        |            | sfax        | 2012  | 4,00  | 35,00       |          | 2,00  |            |
| 23      | 01-juin-93 |            | 2,00   | faf        |            | gabes       | 2012  | 1,00  | 19,00       |          | 1,00  |            |
| 55      | #NULL!     |            | 2,00   | patisiere  |            |             | 2017  | 5,00  | 36,00       |          | 2,00  |            |
| 24      | 27-nov-82  |            | 2,00   | faf        |            | jbeniena    | 2010  | 3,00  | 27,00       |          | 1,00  |            |
| 25      | 27-nov-82  |            | 2,00   | faf        |            | jbeniena    | 2015  | 4,00  | 32,00       |          | 2,00  |            |
| 56      | #####      |            | 3,00   | faf        |            | medenine    | 2016  | 5,00  | 40,00       |          | 1,00  |            |
| 26      | 03-oct-78  |            | 2,00   | faf        |            | mahres      | 2012  | 4,00  | 34,00       |          | 1,00  |            |
| 27      | 03-oct-78  |            | 2,00   | faf        |            | mahres      | 2015  | 5,00  | 37,00       |          | 1,00  |            |
| 29      | 03-oct-78  |            | 2,00   | faf        |            | mahres      | 2016  | 5,00  | 38,00       |          | 2,00  |            |
| 28      | 17-mai-84  |            | 3,00   | ouvriere   |            |             | 2014  | 3,00  | 30,00       |          | 1,00  |            |
| 51      | 21-oct-81  |            | 4,00   | professeur |            | sfax        | 2015  | 4,00  | 34,00       |          | 1,00  |            |
| 30      | #####      |            | 2,00   | faf        |            | hencha      | 2012  | 3,00  | 30,00       |          | 2,00  |            |
| 31      | #NULL!     |            | 2,00   | ouvriere   |            |             | 2013  | 4,00  | 34,00       |          | 1,00  |            |
| 32      | #####      |            | 2,00   | faf        |            | ben guerd   | 2017  | 6,00  | 41,00       |          | 1,00  |            |
| 48      | 30-avr-81  |            | 2,00   | faf        |            | sidi bouzid | 2016  | 4,00  | 34,00       |          | 2,00  |            |
| 33      | #####      |            | 2,00   | faf        |            |             | 2010  | 2,00  | 23,00       |          | 1,00  |            |
| 35      | 31-déc-88  |            | 3,00   | faf        |            |             | 2016  | 3,00  | 27,00       |          | 1,00  |            |
| 37      | 25-juin-88 |            | 3,00   | faf        |            | sfax        | 2012  | 2,00  | 23,00       |          | 2,00  |            |

|    |           |      |           |            |      |      |       |      |
|----|-----------|------|-----------|------------|------|------|-------|------|
| 36 | #####     | 2,00 | faf       | skhira     | 2017 | 3,00 | 29,00 | 2,00 |
| 63 | #####     | 1,00 | faf       | sidibouزيد | 2017 | 4,00 | 34,00 | 1,00 |
| 38 | #####     | 2,00 | faf       | sfax       | 2015 | 4,00 | 35,00 | 2,00 |
| 39 | #####     | 3,00 | faf       | sfax       | 2013 | 4,00 | 32,00 | 2,00 |
| 53 | #####     | 2,00 | faf       | mednine    | 2016 | 5,00 | 36,00 | 1,00 |
| 58 | #####     | 3,00 | faf       | sfax       | 2017 | 2,00 | 23,00 | 2,00 |
| 40 | #####     | 3,00 | faf       | kasserinr  | 2015 | 5,00 | 36,00 | 1,00 |
| 57 | #####     | 3,00 | ouvriere  | medecine   | 2016 | 3,00 | 30,00 | 1,00 |
| 50 | 17-déc-83 | 3,00 | secrtaire | sfax       | 2012 | 3,00 | 29,00 | 2,00 |
| 43 | #####     | 3,00 | faf       | zarzis     | 2014 | 5,00 | 37,00 | 2,00 |
| 44 | #####     | 3,00 | faf       | sfax       | 2012 | 4,00 | 32,00 | 1,00 |

| moyencon gestite | parité | nbre_EV | uteruscicat | ATCD_avo | ATCD_MFI | Mortneon | causemort    |
|------------------|--------|---------|-------------|----------|----------|----------|--------------|
| calendrier       | 4,00   | 3,00    | 3,00        | #NUL!    | 2,00     | 2,00     | 2,00         |
|                  | 4,00   | 2,00    | 1,00        | 1,00     | 1,00     | 2,00     | 2,00         |
| auccun           | 4,00   | 3,00    | 2,00        | 0,00     | 1,00     | 2,00     | 2,00         |
| auccune          | 3,00   | 3,00    | 2,00        | #NUL!    | 2,00     | 2,00     | 2,00         |
|                  | 1,00   | 2,00    | 0,00        | 0,00     | 2,00     | 2,00     | 2,00         |
|                  | 2,00   | 2,00    | 1,00        | #NUL!    | 2,00     | 2,00     | 2,00         |
| calendrier       | 5,00   | 4,00    | 3,00        | 1,00     | 1,00     | 2,00     | 2,00         |
|                  | 1,00   | 1,00    | 0,00        | 2,00     | 2,00     | 2,00     | 2,00         |
| microval         | 4,00   | 3,00    | 2,00        | 0,00     | 1,00     | 2,00     | 2,00         |
|                  | 3,00   | 3,00    | 2,00        | #NUL!    | 2,00     | 2,00     | 2,00         |
| calendrier       | 3,00   | 2,00    | 0,00        | #NUL!    | 1,00     | 2,00     | 2,00         |
| aucun            | 5,00   | 5,00    | 4,00        | #NUL!    | 2,00     | 2,00     | 2,00         |
|                  | 2,00   | 2,00    | 1,00        | 0,00     | 2,00     | 2,00     | 2,00         |
|                  | 3,00   | 2,00    | 2,00        | #NUL!    | 2,00     | 2,00     | 2,00         |
| auccun           | 4,00   | 3,00    | 2,00        | 0,00     | 2,00     | 2,00     | 2,00         |
|                  | 3,00   | 3,00    | 1,00        | #NUL!    | 2,00     | 2,00     | 2,00         |
| auccun           | 1,00   | 1,00    | 0,00        | 0,00     | 2,00     | 2,00     | 2,00         |
| auccun           | 9,00   | 6,00    | 5,00        | 1,00     | 1,00     | 2,00     | 1,00         |
|                  | 1,00   | 1,00    | 0,00        | 0,00     | 2,00     | 2,00     | 2,00         |
| calendrier       | 3,00   | 2,00    | 2,00        | 0,00     | 2,00     | 2,00     | 2,00         |
| calendrier       | 3,00   | 2,00    | 2,00        | #NUL!    | 2,00     | 2,00     | 2,00         |
|                  | 4,00   | 3,00    | 2,00        | #NUL!    | 1,00     | 2,00     | 2,00         |
|                  | 2,00   | 1,00    | 1,00        | #NUL!    | 1,00     | 2,00     | 2,00         |
|                  | 1,00   | 1,00    | 0,00        | 0,00     | 2,00     | 2,00     | 2,00         |
|                  | 2,00   | 2,00    | 1,00        | 0,00     | 2,00     | 2,00     | 2,00         |
| auccune          | 4,00   | 3,00    | 3,00        | 1,00     | 2,00     | 2,00     | 2,00         |
| calendrier       | 3,00   | 2,00    | 1,00        | #NUL!    | 2,00     | 1,00     | 2,00         |
|                  | 3,00   | 3,00    | 3,00        | 0,00     | 2,00     | 2,00     | 2,00         |
|                  | 1,00   | 1,00    | 0,00        | #NUL!    | 2,00     | 2,00     | 2,00         |
| auccun           | 4,00   | 3,00    | 3,00        | 0,00     | 2,00     | 2,00     | 2,00         |
| calendrier       | 3,00   | 3,00    | 2,00        | 0,00     | 2,00     | 2,00     | 2,00         |
| aucun            | 7,00   | 5,00    | 5,00        | 1,00     | 2,00     | 2,00     | 1,00 inconnu |
| auccun           | 1,00   | 1,00    | 0,00        | 0,00     | 2,00     | 2,00     | 2,00         |
|                  | 2,00   | 1,00    | 0,00        | #NUL!    | 2,00     | 2,00     | 2,00         |
| auccun           | 2,00   | 1,00    | 1,00        | 0,00     | 2,00     | 2,00     | 2,00         |
| calendrier       | 3,00   | 2,00    | 2,00        | 0,00     | 2,00     | 2,00     | 2,00         |
| auccun           | 1,00   | 1,00    | 0,00        | 0,00     | 2,00     | 2,00     | 2,00         |
|                  | 1,00   | 1,00    | 0,00        | 0,00     | 2,00     | 2,00     | 2,00         |
|                  | 2,00   | 2,00    | 1,00        | 1,00     | 2,00     | 2,00     | 2,00         |
| auccun           | 3,00   | 2,00    | 2,00        | 2,00     | 2,00     | 2,00     | 2,00         |
|                  | 2,00   | 1,00    | 0,00        | #NUL!    | 1,00     | 2,00     | 2,00         |
| auccune          | 1,00   | 1,00    | 0,00        | #NUL!    | 2,00     | 2,00     | 2,00         |
| auccune          | 4,00   | 3,00    | 2,00        | #NUL!    | 2,00     | 2,00     | 1,00         |
|                  | 2,00   | 2,00    | 1,00        | #NUL!    | 2,00     | 2,00     | 2,00         |
| auccun           | 3,00   | 1,00    | 0,00        | #NUL!    | 2,00     | 2,00     | 2,00         |
| auccun           | 2,00   | 2,00    | 2,00        | 0,00     | 2,00     | 2,00     | 2,00         |
|                  | 1,00   | 1,00    | 0,00        | #NUL!    | 2,00     | 2,00     | 2,00         |
|                  | 1,00   | 1,00    | 0,00        | #NUL!    | 2,00     | 2,00     | 2,00         |
| auccun           | 6,00   | 3,00    | 3,00        | 0,00     | 1,00     | 2,00     | 2,00         |

|            |      |      |      |       |      |      |      |
|------------|------|------|------|-------|------|------|------|
| aucune     | 4,00 | 3,00 | 2,00 | #NUL! | 2,00 | 2,00 | 2,00 |
|            | 5,00 | 3,00 | 2,00 | 0,00  | 1,00 | 2,00 | 2,00 |
| aucun      | 4,00 | 3,00 | 3,00 | 0,00  | 2,00 | 2,00 | 2,00 |
| aucun      | 2,00 | 2,00 | 1,00 | 0,00  | 2,00 | 2,00 | 2,00 |
| microprogr | 3,00 | 2,00 | 2,00 | 0,00  | 2,00 | 2,00 | 2,00 |
| aucun      | 2,00 | 1,00 | 0,00 | #NUL! | 1,00 | 2,00 | 2,00 |
|            | 1,00 | 1,00 | 0,00 | #NUL! | 2,00 | 2,00 | 2,00 |
| aucun      | 1,00 | 1,00 | 0,00 | 0,00  | 2,00 | 2,00 | 2,00 |
| calendrier | 1,00 | 1,00 | 0,00 | #NUL! | 2,00 | 2,00 | 2,00 |
| aucun      | 5,00 | 4,00 | 3,00 | 0,00  | 1,00 | 2,00 | 2,00 |
| aucun      | 1,00 | 1,00 | 0,00 | 0,00  | 2,00 | 2,00 | 2,00 |



|      |      |      |      |      |      |       |       |       |
|------|------|------|------|------|------|-------|-------|-------|
| 2,00 | 3,00 | 2,00 | 2,00 | 2,00 | 1,00 | #NUL! | 2013  | #NUL! |
| 2,00 | 2,00 | 2,00 | 2,00 | 2,00 | 2,00 | #NUL! | #NUL! | #NUL! |
| 2,00 | 3,00 | 2,00 | 2,00 | 2,00 | 2,00 | #NUL! | #NUL! | #NUL! |
| 2,00 | 3,00 | 2,00 | 2,00 | 2,00 | 2,00 | #NUL! | #NUL! | #NUL! |
| 2,00 | 3,00 | 2,00 | 2,00 | 2,00 | 2,00 | #NUL! | #NUL! | #NUL! |
| 2,00 | 3,00 | 2,00 | 2,00 | 2,00 | 2,00 | #NUL! | #NUL! | #NUL! |
| 2,00 | 3,00 | 2,00 | 2,00 | 2,00 | 2,00 | #NUL! | #NUL! | #NUL! |
| 2,00 | 3,00 | 2,00 | 2,00 | 2,00 | 2,00 | #NUL! | #NUL! | #NUL! |
| 2,00 | 1,00 | 2,00 | 2,00 | 2,00 | 2,00 | #NUL! | #NUL! | #NUL! |
| 2,00 | 3,00 | 2,00 | 2,00 | 2,00 | 2,00 | #NUL! | #NUL! | #NUL! |
| 2,00 | 3,00 | 2,00 | 2,00 | 2,00 | 2,00 | #NUL! | #NUL! | #NUL! |
| 2,00 | 1,00 | 1,00 | 2,00 | 2,00 | 2,00 | #NUL! | #NUL! | #NUL! |

| année_dm | ATCD_CM | NYHA | valv_avant | valv_auco | termedeco | decouvert | εsinusal | ACFA |
|----------|---------|------|------------|-----------|-----------|-----------|----------|------|
| #NUL!    | 2,00    | 3,00 | 1,00       | 2,00      | #NUL!     | #NUL!     | 2,00     | 1,00 |
| #NUL!    | 2,00    | 2,00 | 1,00       | 2,00      | #NUL!     | #NUL!     | 1,00     | 2,00 |
| #NUL!    | 2,00    | 1,00 | 2,00       | 1,00      | 27,00     | #NUL!     | 1,00     | 2,00 |
| #NUL!    | 2,00    | 1,00 | 1,00       | 2,00      | #NUL!     | #NUL!     | 2,00     | 1,00 |
| #NUL!    | 2,00    | 1,00 | 2,00       | 1,00      | 16,00     | #NUL!     | 2,00     | 2,00 |
| #NUL!    | 2,00    | 2,00 | 2,00       | 1,00      | 25,00     | #NUL!     | 2,00     | 1,00 |
| #NUL!    | 2,00    | 2,00 | 1,00       | 2,00      | #NUL!     | #NUL!     | 1,00     | 2,00 |
| #NUL!    | 2,00    | 1,00 | 1,00       | 2,00      | #NUL!     | 1,00      | 1,00     | 2,00 |
| #NUL!    | 2,00    | 1,00 | 1,00       | 2,00      | #NUL!     | #NUL!     | 1,00     | 2,00 |
| #NUL!    | 2,00    | 2,00 | 1,00       | 2,00      | #NUL!     | #NUL!     | 1,00     | 2,00 |
| #NUL!    | 2,00    | 1,00 | 1,00       | 2,00      | #NUL!     | #NUL!     | 2,00     | 1,00 |
| #NUL!    | 2,00    | 1,00 | 1,00       | 2,00      | #NUL!     | #NUL!     | 2,00     | 1,00 |
| #NUL!    | 2,00    | 1,00 | 2,00       | 1,00      | 26,00     | #NUL!     | 1,00     | 1,00 |
| #NUL!    | 2,00    | 1,00 | 1,00       | 2,00      | #NUL!     | #NUL!     | 1,00     | 2,00 |
| #NUL!    | 2,00    | 2,00 | 2,00       | 1,00      | 16,00     | #NUL!     | 1,00     | 2,00 |
| #NUL!    | 2,00    | 2,00 | 1,00       | 2,00      | #NUL!     | #NUL!     | 1,00     | 2,00 |
| #NUL!    | 2,00    | 1,00 | 1,00       | 2,00      | #NUL!     | #NUL!     | 1,00     | 2,00 |
| #NUL!    | 2,00    | 1,00 | 1,00       | 2,00      | #NUL!     | #NUL!     | 1,00     | 2,00 |
| #NUL!    | 2,00    | 1,00 | 1,00       | 2,00      | #NUL!     | #NUL!     | 1,00     | 2,00 |
| #NUL!    | #NUL!   | 1,00 | 2,00       | 1,00      | 26,00     | 2,00      | 2,00     | 1,00 |
| #NUL!    | 2,00    | 2,00 | 1,00       | 2,00      | 32,00     | #NUL!     | 1,00     | 2,00 |
| #NUL!    | 2,00    | 1,00 | 1,00       | 2,00      | #NUL!     | #NUL!     | 1,00     | 2,00 |
| #NUL!    | 2,00    | 2,00 | 2,00       | 1,00      | 32,00     | #NUL!     | 2,00     | 1,00 |
| #NUL!    | 2,00    | 1,00 | 1,00       | 2,00      | #NUL!     | #NUL!     | 2,00     | 1,00 |
| #NUL!    | 2,00    | 1,00 | 2,00       | 1,00      | 30,00     | #NUL!     | 1,00     | 2,00 |
| #NUL!    | 2,00    | 2,00 | 1,00       | 2,00      | #NUL!     | #NUL!     | 1,00     | 2,00 |
| #NUL!    | 2,00    | 1,00 | 2,00       | 1,00      | 30,00     | 1,00      | 1,00     | 2,00 |
| #NUL!    | 2,00    | 1,00 | 2,00       | 1,00      | 36,00     | #NUL!     | 1,00     | 2,00 |
| #NUL!    | 2,00    | 2,00 | 2,00       | 1,00      | #NUL!     | #NUL!     | 1,00     | 2,00 |
| #NUL!    | 2,00    | 1,00 | 2,00       | 1,00      | 28,00     | #NUL!     | 1,00     | 2,00 |
| #NUL!    | 2,00    | 2,00 | 2,00       | 1,00      | 24,00     | #NUL!     | 2,00     | 1,00 |
| #NUL!    | 2,00    | 2,00 | 2,00       | 1,00      | 26,00     | #NUL!     | 1,00     | 2,00 |
| #NUL!    | 2,00    | 2,00 | 1,00       | 2,00      | #NUL!     | #NUL!     | 2,00     | 1,00 |
| #NUL!    | 2,00    | 3,00 | 2,00       | 1,00      | 36,00     | #NUL!     | 1,00     | 2,00 |
| #NUL!    | 2,00    | 2,00 | 1,00       | 2,00      | #NUL!     | #NUL!     | 1,00     | 2,00 |
| #NUL!    | 2,00    | 2,00 | 2,00       | 1,00      | 28,00     | #NUL!     | 1,00     | 2,00 |
| #NUL!    | 2,00    | 2,00 | 1,00       | 2,00      | #NUL!     | #NUL!     | 2,00     | 1,00 |
| #NUL!    | 2,00    | 2,00 | 2,00       | 1,00      | 33,00     | 2,00      | 2,00     | 1,00 |
| #NUL!    | 2,00    | 1,00 | 1,00       | 2,00      | #NUL!     | #NUL!     | 1,00     | 2,00 |
| 2003,00  | 2,00    | 2,00 | 1,00       | 2,00      | #NUL!     | #NUL!     | 2,00     | 1,00 |
| #NUL!    | 2,00    | 2,00 | 1,00       | 2,00      | #NUL!     | #NUL!     | 2,00     | 1,00 |
| #NUL!    | 2,00    | 2,00 | 1,00       | 2,00      | #NUL!     | #NUL!     | 2,00     | 1,00 |
| #NUL!    | 2,00    | 1,00 | 2,00       | 1,00      | 32,00     | #NUL!     | 1,00     | 2,00 |
| #NUL!    | 2,00    | 1,00 | 2,00       | 1,00      | 38,00     | #NUL!     | 1,00     | 2,00 |
| #NUL!    | 2,00    | 1,00 | 1,00       | 2,00      | #NUL!     | #NUL!     | 1,00     | 2,00 |
| #NUL!    | 2,00    | 3,00 | 2,00       | 1,00      | 35,00     | #NUL!     | 2,00     | 1,00 |
| #NUL!    | 2,00    | 2,00 | 2,00       | 1,00      | 20,00     | #NUL!     | 1,00     | 2,00 |
| #NUL!    | 2,00    | 3,00 | 1,00       | 2,00      | #NUL!     | #NUL!     | 2,00     | 1,00 |
| #NUL!    | 2,00    | 1,00 | 2,00       | 1,00      | 36,00     | #NUL!     | 1,00     | 2,00 |
| #NUL!    | 2,00    | 3,00 | 2,00       | 1,00      | 16,00     | #NUL!     | 1,00     | 2,00 |

|       |      |      |      |      |       |       |      |      |
|-------|------|------|------|------|-------|-------|------|------|
| #NUL! | 2,00 | 2,00 | 1,00 | 2,00 | #NUL! | #NUL! | 2,00 | 1,00 |
| #NUL! | 2,00 | 2,00 | 2,00 | 1,00 | 28,00 | #NUL! | 2,00 | 1,00 |
| #NUL! | 2,00 | 1,00 | 2,00 | 1,00 | 8,00  | #NUL! | 1,00 | 2,00 |
| #NUL! | 2,00 | 1,00 | 1,00 | 2,00 | #NUL! | #NUL! | 1,00 | 2,00 |
| #NUL! | 2,00 | 1,00 | 2,00 | 1,00 | 24,00 | 1,00  | 1,00 | 2,00 |
| #NUL! | 2,00 | 1,00 | 1,00 | 2,00 | #NUL! | #NUL! | 2,00 | 1,00 |
| #NUL! | 2,00 | 2,00 | 2,00 | 1,00 | 28,00 | #NUL! | 2,00 | 1,00 |
| #NUL! | 2,00 | 1,00 | 2,00 | 1,00 | 32,00 | #NUL! | 1,00 | 2,00 |
| #NUL! | 2,00 | 2,00 | 2,00 | 1,00 | 12,00 | #NUL! | 1,00 | 2,00 |
| #NUL! | 2,00 | 2,00 | 2,00 | 1,00 | 35,00 | #NUL! | 2,00 | 1,00 |
| #NUL! | 2,00 | 1,00 | 2,00 | 1,00 | 28,00 | #NUL! | 1,00 | 2,00 |



| Anemie | HB   | termeETT | FeVG  | DTDVG | DTSVG | PAPS  | DiamètreC | polyvalvulc |
|--------|------|----------|-------|-------|-------|-------|-----------|-------------|
| 1,00   | 10,1 | 39,00    | 60,00 | 44,00 | 29,00 | 70,00 | 62,00     | 2,00        |
| 2,00   | 11,0 | 13,00    | 60,00 | 50,00 | 33,00 | 36,00 | 61,00     | 2,00        |
| 2,00   | 11,0 | 27,00    | 60,00 | 41,00 | 28,00 | 55,00 | 43,00     | 1,00        |
| 1,00   | 9,0  | 35,00    | 50,00 | 50,00 | 31,00 | 35,00 | 57,00     | 2,00        |
| 1,00   | 9,7  | 27,00    | 65,00 | 45,00 | 30,00 | 60,00 | 58,00     | 2,00        |
| 2,00   | 11,1 | 25,00    | 50,00 | 55,00 | 36,00 | 55,00 | 50,00     | 1,00        |
| 1,00   | 12,2 | 32,00    | 60,00 | 56,00 | 36,00 | 35,00 | 49,00     | 2,00        |
| 2,00   | 11,7 | 38,00    | 60,00 | 59,00 | 40,00 | 30,00 | 42,00     | 1,00        |
| 2,00   | 12,0 | 35,00    | 60,00 | 45,00 | 25,00 | 45,00 | 44,00     | 2,00        |
| 1,00   | 9,6  | 36,00    | 60,00 | 48,00 | 32,00 | 60,00 | 54,00     | 1,00        |
| 1,00   | 10,0 | 38,00    | 60,00 | 40,00 | 25,00 | 70,00 | 58,00     | 1,00        |
| 1,00   | 11,0 | 26,00    | 60,00 | 48,00 | 25,00 | 50,00 | 50,00     | 1,00        |
| 1,00   | 11,3 | 26,00    | 60,00 | 48,00 | 21,00 | 38,00 | 39,00     | 2,00        |
| 1,00   | 10,0 | 22,00    | 65,00 | 52,00 | 35,00 | 35,00 | 52,00     | 2,00        |
| 1,00   | 8,7  | 30,00    | 60,00 | 57,00 | 36,00 | 45,00 | 47,00     | 2,00        |
| 2,00   | 12,0 | 17,00    | 66,00 | 53,00 | 33,00 | 42,00 | 47,00     | 2,00        |
| 2,00   | 11,0 | 32,00    | 60,00 | 50,00 | 35,00 | 20,00 | 40,00     | 2,00        |
| 1,00   | 9,3  | 33,00    | 60,00 | 48,00 | 29,00 | 28,00 | 51,00     | 1,00        |
| 2,00   | 11,0 | 26,00    | 60,00 | 45,00 | 29,00 | 42,00 | 57,00     | 2,00        |
| 1,00   | 9,0  | 32,00    | 60,00 | 45,00 | 25,00 | 41,00 | 46,00     | 1,00        |
| 1,00   | 9,0  | 32,00    | 60,00 | 45,00 | 25,00 | 35,00 | 45,00     | 2,00        |
| 2,00   | 11,0 | 32,00    | 60,00 | 35,00 | 24,00 | 70,00 | 65,00     | 2,00        |
| 2,00   | 12,0 | 39,00    | 60,00 | 51,00 | 39,00 | 51,00 | 51,00     | 1,00        |
| 1,00   | 9,0  | 30,00    | 60,00 | 48,00 | 28,00 | 29,00 | 45,00     | 2,00        |
| 1,00   | 9,5  | 33,00    | 60,00 | 49,00 | 30,00 | 45,00 | 49,00     | 1,00        |
| 1,00   | 7,0  | #NUL!    | 50,00 | 60,00 | 45,00 | 70,00 | 52,00     | 1,00        |
| 1,00   | 9,0  | 36,00    | 60,00 | 52,00 | 31,00 | 50,00 | 46,00     | 1,00        |
| 2,00   | 12,0 | #NUL!    | 25,00 | 65,00 | 53,00 | 85,00 | 64,00     | 1,00        |
| 2,00   | 11,3 | 28,00    | 60,00 | 45,00 | 25,00 | 38,00 | 58,00     | 1,00        |
| 1,00   | 10,0 | 25,00    | 60,00 | 46,00 | 26,00 | 63,00 | 53,00     | 2,00        |
| 1,00   | 9,2  | 26,00    | 50,00 | 41,00 | 26,00 | 70,00 | 45,00     | 2,00        |
| 1,00   | 9,0  | 27,00    | 60,00 | 46,00 | 29,00 | 45,00 | 51,00     | 1,00        |
| 1,00   | 9,0  | 36,00    | 60,00 | 55,00 | 26,00 | 40,00 | 40,00     | 2,00        |
| 2,00   | 11,9 | 24,00    | 60,00 | 57,00 | 40,00 | 35,00 | 52,00     | 2,00        |
| 1,00   | 10,0 | 29,00    | 60,00 | 55,00 | 33,00 | 55,00 | 60,00     | 2,00        |
| 1,00   | 10,0 | 32,00    | 60,00 | 49,00 | 37,00 | 75,00 | 58,00     | 2,00        |
| 2,00   | 12,4 | 33,00    | 55,00 | 45,00 | 33,00 | 55,00 | 58,00     | 1,00        |
| 2,00   | 11,5 | 30,00    | 65,00 | 49,00 | 34,00 | 65,00 | 48,00     | 1,00        |
| 1,00   | 9,0  | 29,00    | 65,00 | 50,00 | 35,00 | 55,00 | 55,00     | 1,00        |
| 1,00   | 9,4  | 12,00    | 65,00 | 56,00 | 42,00 | 63,00 | 53,00     | 1,00        |
| 1,00   | 9,7  | 34,00    | 65,00 | 52,00 | 35,00 | 42,00 | 52,00     | 1,00        |
| 2,00   | 11,0 | #NUL!    | 60,00 | 49,00 | 31,00 | 69,00 | 52,00     | 1,00        |
| 1,00   | 9,2  | 38,00    | 45,00 | 59,00 | 42,00 | 57,00 | 48,00     | 2,00        |
| 1,00   | 10,4 | 34,00    | 60,00 | 52,00 | 35,00 | 50,00 | 50,00     | 1,00        |
| 2,00   | 11,5 | 35,00    | 60,00 | 42,00 | 22,00 | 95,00 | 60,00     | 2,00        |
| 2,00   | 12,0 | 24,00    | 60,00 | 48,00 | 34,00 | 38,00 | 45,00     | 1,00        |
| 1,00   | 9,3  | 37,00    | 60,00 | 47,00 | 34,00 | 62,00 | 54,00     | 2,00        |
| 2,00   | 11,0 | 39,00    | 60,00 | 55,00 | 35,00 | 30,00 | 37,00     | 2,00        |
| 1,00   | 10,0 | 17,00    | 60,00 | 33,00 | 18,00 | 55,00 | 48,00     | 2,00        |

|      |      |       |       |       |       |       |       |      |
|------|------|-------|-------|-------|-------|-------|-------|------|
| 2,00 | 12,7 | 33,00 | 55,00 | 45,00 | 25,00 | 75,00 | 52,00 | 2,00 |
| 2,00 | 11,0 | 28,00 | 60,00 | 45,00 | 25,00 | 65,00 | 53,00 | 1,00 |
| 1,00 | 9,0  | 9,00  | 55,00 | 46,00 | 31,00 | 50,00 | 32,00 | 1,00 |
| 2,00 | 11,0 | 28,00 | 65,00 | 45,00 | 25,00 | 39,00 | 42,00 | 2,00 |
| 1,00 | 9,2  | 24,00 | 50,00 | 48,00 | 33,00 | 65,00 | 54,00 | 1,00 |
| 1,00 | 9,4  | 33,00 | 60,00 | 50,00 | 35,00 | 30,00 | 45,00 | 1,00 |
| 2,00 | 12,3 | 28,00 | 60,00 | 66,00 | 44,00 | 40,00 | 55,00 | 2,00 |
| 1,00 | 10,0 | 33,00 | 60,00 | 51,00 | 33,00 | 50,00 | 47,00 | 2,00 |
| 1,00 | 9,0  | 19,00 | 65,00 | 45,00 | 30,00 | 36,00 | 44,00 | 2,00 |
| 1,00 | 9,0  | 35,00 | 60,00 | 69,00 | 47,00 | 80,00 | 71,00 | 2,00 |
| 1,00 | 9,0  | 28,00 | 60,00 | 45,00 | 26,00 | 35,00 | 45,00 | 1,00 |

| RM   | RM_enton | severite_R | surfacemit | Gradient | IM   | severiteIM | mecanism       | SOR_IM |
|------|----------|------------|------------|----------|------|------------|----------------|--------|
| 1,00 | #NUL!    | 1,00       | 0,90       | 16,00    | 2,00 | #NUL!      |                | #NUL!  |
| 1,00 | 2,00     | 1,00       | 1,38       | 6,00     | 1,00 | 1,00       | restriction    | 53,00  |
| 1,00 | #NUL!    | 1,00       | 1,20       | 25,00    | 2,00 | #NUL!      |                | #NUL!  |
| 1,00 | 2,00     | 1,00       | 1,30       | 16,00    | 2,00 | #NUL!      |                | #NUL!  |
| 1,00 | 2,00     | 1,00       | 1,20       | 20,00    | 2,00 | 3,00       | restriction    | 5,00   |
| 1,00 | #NUL!    | 1,00       | 1,20       | 20,00    | 2,00 | #NUL!      |                | #NUL!  |
| 2,00 | #NUL!    | #NUL!      | #NUL!      | #NUL!    | 1,00 | 1,00       | restriction    | 38,00  |
| 2,00 | #NUL!    | #NUL!      | #NUL!      | #NUL!    | 1,00 | 3,00       | ischemique     | 13,00  |
| 1,00 | 2,00     | 1,00       | 1,40       | 14,00    | 2,00 | #NUL!      |                | #NUL!  |
| 1,00 | #NUL!    | 1,00       | 1,70       | 20,00    | 1,00 | 3,00       | restriction    | 12,00  |
| 1,00 | 2,00     | 1,00       | 1,00       | 15,00    | 1,00 | 2,00       | restriction    | 25,00  |
| 1,00 | 1,00     | 1,00       | 1,40       | 15,00    | 1,00 | 3,00       | restriction    | 25,00  |
| 2,00 | #NUL!    | #NUL!      | #NUL!      | #NUL!    | 2,00 | #NUL!      |                | #NUL!  |
| 1,00 | #NUL!    | 1,00       | 1,30       | 11,00    | 1,00 | 3,00       | rstriction d   | 15,00  |
| 1,00 | #NUL!    | 1,00       | 1,20       | 18,00    | 1,00 | 3,00       | restriction    | 12,00  |
| 2,00 | #NUL!    | #NUL!      | #NUL!      | #NUL!    | 1,00 | 1,00       | restriction    | 40,00  |
| 2,00 | #NUL!    | #NUL!      | #NUL!      | #NUL!    | 2,00 | #NUL!      |                | #NUL!  |
| 1,00 | 2,00     | 1,00       | 1,00       | 1,20     | 2,00 | #NUL!      |                | #NUL!  |
| 1,00 | 1,00     | 1,00       | 1,30       | 15,00    | 2,00 | #NUL!      |                | #NUL!  |
| 1,00 | 1,00     | 1,00       | 1,70       | 24,00    | 1,00 | 4,00       |                | #NUL!  |
| 1,00 | 2,00     | 1,00       | 1,40       | 11,00    | 2,00 | #NUL!      |                | #NUL!  |
| 1,00 | #NUL!    | 1,00       | 0,90       | 15,00    | 2,00 | #NUL!      |                | #NUL!  |
| 1,00 | 1,00     | 1,00       | 1,70       | 16,00    | 2,00 | #NUL!      |                | #NUL!  |
| 1,00 | 2,00     | 1,00       | 1,10       | 15,00    | 2,00 | #NUL!      |                | #NUL!  |
| 1,00 | 1,00     | 1,00       | 1,60       | 16,00    | 1,00 | 3,00       | restriction    | 11,00  |
| 1,00 | 2,00     | 3,00       | 2,00       | 8,00     | 1,00 | 1,00       | prolapsus      | 42,00  |
| 1,00 | 1,00     | 1,00       | 1,60       | 19,00    | 1,00 | 2,00       | restriction    | 28,00  |
| 1,00 | 2,00     | 1,00       | 0,70       | 26,00    | 1,00 | 3,00       | restrictionl   | 12,00  |
| 1,00 | 2,00     | 1,00       | 1,30       | 16,00    | 2,00 | #NUL!      |                | #NUL!  |
| 1,00 | 2,00     | 1,00       | 1,10       | 21,00    | 2,00 | #NUL!      |                | #NUL!  |
| 1,00 | 2,00     | 1,00       | 1,00       | 30,00    | 2,00 | #NUL!      |                | #NUL!  |
| 1,00 | 2,00     | 1,00       | 1,20       | 10,00    | 1,00 | 3,00       | restriction    | 22,00  |
| 2,00 | #NUL!    | #NUL!      | #NUL!      | #NUL!    | 2,00 | #NUL!      |                | #NUL!  |
| 2,00 | #NUL!    | #NUL!      | #NUL!      | #NUL!    | 1,00 | 1,00       | restriction    | 40,00  |
| 1,00 | 1,00     | 1,00       | 1,00       | 21,00    | 2,00 | #NUL!      |                | #NUL!  |
| 1,00 | 2,00     | 1,00       | 1,00       | 14,00    | 1,00 | 3,00       | restriction    | 21,00  |
| 1,00 | 2,00     | 1,00       | 1,20       | 18,00    | 1,00 | 3,00       | restriction    | 11,00  |
| 1,00 | 2,00     | 1,00       | 1,50       | 17,00    | 1,00 | 2,00       | restriction    | 31,00  |
| 1,00 | 2,00     | 2,00       | 1,70       | 9,00     | 1,00 | 1,00       | restriction    | 42,00  |
| 1,00 | 2,00     | 1,00       | 1,00       | 13,00    | 1,00 | 3,00       | restriction    | 13,00  |
| 1,00 | 2,00     | 1,00       | 1,50       | 13,00    | 1,00 | 2,00       | retrestriction | 24,00  |
| 1,00 | 2,00     | 1,00       | 1,20       | 14,00    | 1,00 | 3,00       | restriction    | 13,00  |
| 1,00 | 2,00     | 1,00       | 1,30       | 21,00    | 1,00 | 1,00       | restriction    | 42,00  |
| 1,00 | 1,00     | 1,00       | 1,60       | 15,00    | 1,00 | 4,00       | restrictioo    | #NUL!  |
| 1,00 | 2,00     | 1,00       | 1,00       | 22,00    | 2,00 | #NUL!      |                | #NUL!  |
| 1,00 | 2,00     | 1,00       | 1,50       | 10,00    | 1,00 | 3,00       | restriction    | 11,00  |
| 1,00 | 2,00     | 1,00       | 1,00       | #NUL!    | 2,00 | #NUL!      |                | #NUL!  |
| 2,00 | #NUL!    | #NUL!      | #NUL!      | #NUL!    | 2,00 | #NUL!      |                | #NUL!  |
| 1,00 | 2,00     | 1,00       | 0,90       | 28,00    | 2,00 | #NUL!      |                | #NUL!  |

|      |       |       |       |       |      |                  |        |
|------|-------|-------|-------|-------|------|------------------|--------|
| 1,00 | 2,00  | 1,00  | 1,00  | 16,00 | 2,00 | #NUL!            | #NUL!  |
| 1,00 | 1,00  | 1,00  | 1,00  | 24,00 | 1,00 | 3,00 restriction | 12,00  |
| 2,00 | #NUL! | #NUL! | #NUL! | #NUL! | 2,00 | 3,00 restriction | 11,00  |
| 2,00 | #NUL! | #NUL! | #NUL! | #NUL! | 1,00 | 1,00 restriction | 42,00  |
| 1,00 | 2,00  | 1,00  | 1,00  | 20,00 | 1,00 | 3,00 restriction | 11,00  |
| 2,00 | #NUL! | #NUL! | #NUL! | #NUL! | 2,00 | #NUL!            | #NUL!  |
| 2,00 | #NUL! | #NUL! | #NUL! | #NUL! | 1,00 | 1,00 restriction | 71,00  |
| 1,00 | #NUL! | 1,00  | 1,20  | 20,00 | 2,00 | #NUL!            | #NUL!  |
| 1,00 | 2,00  | 1,00  | 1,20  | 12,00 | 2,00 | #NUL!            | #NUL!  |
| 2,00 | #NUL! | #NUL! | #NUL! | #NUL! | 1,00 | 1,00 prolapsus / | 127,00 |
| 2,00 | #NUL! | #NUL! | #NUL! | #NUL! | 2,00 | #NUL!            | #NUL!  |

| VR_IM | RAo  | severite_R | surfaceaor | GradientAc | IA   | severite_I | SOR_IA | VR_IA |
|-------|------|------------|------------|------------|------|------------|--------|-------|
| #NUL! | 2,00 | #NUL!      | #NUL!      | #NUL!      | 2,00 | #NUL!      | #NUL!  | #NUL! |
| 65,00 | 1,00 | 2,00       | 1,37       | 23,00      | 1,00 | 3,00       | 21,00  | 25,00 |
| #NUL! | 2,00 | #NUL!      | #NUL!      | #NUL!      | 2,00 | #NUL!      | #NUL!  | #NUL! |
| #NUL! | 2,00 | #NUL!      | #NUL!      | #NUL!      | 2,00 | #NUL!      | #NUL!  | #NUL! |
| #NUL! | 2,00 | #NUL!      | #NUL!      | #NUL!      | 2,00 | #NUL!      | #NUL!  | #NUL! |
| #NUL! | 1,00 | 1,00       | #NUL!      | 53,00      | 1,00 | 2,00       | #NUL!  | #NUL! |
| 60,00 | 2,00 | #NUL!      | #NUL!      | #NUL!      | 2,00 | #NUL!      | #NUL!  | #NUL! |
| 31,00 | 1,00 | 1,00       | 0,60       | 84,00      | 1,00 | 2,00       | 19,00  | 45,00 |
| #NUL! | 2,00 | #NUL!      | #NUL!      | #NUL!      | 2,00 | #NUL!      | #NUL!  | #NUL! |
| 26,00 | 2,00 | #NUL!      | #NUL!      | #NUL!      | 2,00 | #NUL!      | #NUL!  | #NUL! |
| 40,00 | 2,00 | #NUL!      | #NUL!      | #NUL!      | 2,00 | #NUL!      | #NUL!  | #NUL! |
| 36,00 | 2,00 | #NUL!      | #NUL!      | #NUL!      | 2,00 | #NUL!      | #NUL!  | #NUL! |
| #NUL! | 1,00 | 1,00       | #NUL!      | #NUL!      | 1,00 | 2,00       | 26,00  | 54,00 |
| 26,00 | 1,00 | 1,00       | #NUL!      | 55,00      | 2,00 | 3,00       | 9,00   | 18,00 |
| 23,00 | 1,00 | 2,00       | 1,17       | 39,00      | 1,00 | 1,00       | 30,00  | 60,00 |
| 60,00 | 2,00 | #NUL!      | #NUL!      | #NUL!      | 2,00 | #NUL!      | #NUL!  | #NUL! |
| #NUL! | 2,00 | #NUL!      | #NUL!      | #NUL!      | 2,00 | #NUL!      | #NUL!  | #NUL! |
| #NUL! | 2,00 | #NUL!      | #NUL!      | #NUL!      | 2,00 | #NUL!      | #NUL!  | #NUL! |
| #NUL! | 2,00 | #NUL!      | #NUL!      | #NUL!      | 2,00 | #NUL!      | #NUL!  | #NUL! |
| #NUL! | 1,00 | 3,00       | 1,50       | 25,00      | 2,00 | #NUL!      | #NUL!  | #NUL! |
| #NUL! | 2,00 | #NUL!      | #NUL!      | #NUL!      | 2,00 | #NUL!      | #NUL!  | #NUL! |
| #NUL! | 2,00 | #NUL!      | #NUL!      | #NUL!      | 2,00 | #NUL!      | #NUL!  | #NUL! |
| #NUL! | 2,00 | #NUL!      | #NUL!      | #NUL!      | 2,00 | #NUL!      | #NUL!  | #NUL! |
| #NUL! | 2,00 | #NUL!      | #NUL!      | #NUL!      | 2,00 | #NUL!      | #NUL!  | #NUL! |
| 25,00 | 2,00 | #NUL!      | #NUL!      | #NUL!      | 2,00 | #NUL!      | #NUL!  | #NUL! |
| 65,00 | 2,00 | #NUL!      | #NUL!      | #NUL!      | 2,00 | #NUL!      | #NUL!  | #NUL! |
| 45,00 | 2,00 | #NUL!      | #NUL!      | #NUL!      | 2,00 | #NUL!      | #NUL!  | #NUL! |
| 24,00 | 2,00 | #NUL!      | #NUL!      | #NUL!      | 1,00 | 3,00       | 28,00  | 36,00 |
| #NUL! | 2,00 | #NUL!      | #NUL!      | #NUL!      | 2,00 | #NUL!      | #NUL!  | #NUL! |
| #NUL! | 2,00 | #NUL!      | #NUL!      | #NUL!      | 2,00 | #NUL!      | #NUL!  | #NUL! |
| #NUL! | 2,00 | #NUL!      | #NUL!      | #NUL!      | 2,00 | #NUL!      | #NUL!  | #NUL! |
| 32,00 | 1,00 | 3,00       | 1,85       | 23,00      | 1,00 | 2,00       | 22,00  | 35,00 |
| #NUL! | 1,00 | 1,00       | #NUL!      | 114,00     | 2,00 | #NUL!      | #NUL!  | #NUL! |
| 60,00 | 2,00 | #NUL!      | #NUL!      | #NUL!      | 2,00 | #NUL!      | #NUL!  | #NUL! |
| #NUL! | 2,00 | #NUL!      | #NUL!      | #NUL!      | 2,00 | #NUL!      | #NUL!  | #NUL! |
| 29,00 | 2,00 | #NUL!      | #NUL!      | #NUL!      | 2,00 | #NUL!      | #NUL!  | #NUL! |
| 15,00 | 2,00 | #NUL!      | #NUL!      | #NUL!      | 2,00 | #NUL!      | #NUL!  | #NUL! |
| 45,00 | 1,00 | 2,00       | 1,10       | 47,00      | 1,00 | 3,00       | 18,00  | 35,00 |
| 69,00 | 1,00 | 1,00       | 1,00       | 55,00      | 1,00 | 4,00       | #NUL!  | #NUL! |
| 28,00 | 1,00 | 1,00       | 0,90       | 50,00      | 1,00 | 3,00       | 12,00  | 23,00 |
| 40,00 | 2,00 | #NUL!      | #NUL!      | #NUL!      | 2,00 | #NUL!      | #NUL!  | #NUL! |
| 20,00 | 2,00 | #NUL!      | #NUL!      | #NUL!      | 2,00 | #NUL!      | #NUL!  | #NUL! |
| 64,00 | 2,00 | #NUL!      | #NUL!      | #NUL!      | 2,00 | #NUL!      | #NUL!  | #NUL! |
| #NUL! | 2,00 | #NUL!      | #NUL!      | #NUL!      | 1,00 | 3,00       | 15,00  | 25,00 |
| #NUL! | 2,00 | #NUL!      | #NUL!      | #NUL!      | 2,00 | #NUL!      | #NUL!  | #NUL! |
| 14,00 | 2,00 | #NUL!      | #NUL!      | #NUL!      | 1,00 | 3,00       | 13,00  | 28,00 |
| #NUL! | 2,00 | #NUL!      | #NUL!      | #NUL!      | 2,00 | #NUL!      | #NUL!  | #NUL! |
| #NUL! | 1,00 | 1,00       | 1,00       | 55,00      | 2,00 | #NUL!      | #NUL!  | #NUL! |
| #NUL! | 2,00 | #NUL!      | #NUL!      | #NUL!      | 2,00 | #NUL!      | #NUL!  | #NUL! |

|        |      |       |       |       |      |       |       |       |
|--------|------|-------|-------|-------|------|-------|-------|-------|
| #NUL!  | 2,00 | #NUL! | #NUL! | #NUL! | 2,00 | #NUL! | #NUL! | #NUL! |
| 25,00  | 2,00 | #NUL! | #NUL! | #NUL! | 2,00 | #NUL! | #NUL! | #NUL! |
| 18,00  | 1,00 | 1,00  | 0,60  | 55,00 | 1,00 | 1,00  | 37,00 | 65,00 |
| 65,00  | 2,00 | #NUL! | #NUL! | #NUL! | 2,00 | #NUL! | #NUL! | #NUL! |
| 12,00  | 2,00 | #NUL! | #NUL! | #NUL! | 1,00 | 23,00 | 29,00 | #NUL! |
| #NUL!  | 1,00 | 1,00  | #NUL! | 64,00 | 2,00 | #NUL! | #NUL! | #NUL! |
| 104,00 | 2,00 | #NUL! | #NUL! | #NUL! | 2,00 | #NUL! | #NUL! | #NUL! |
| #NUL!  | 2,00 | #NUL! | #NUL! | #NUL! | 2,00 | #NUL! | #NUL! | #NUL! |
| #NUL!  | 2,00 | #NUL! | #NUL! | #NUL! | 2,00 | #NUL! | #NUL! | #NUL! |
| 139,00 | 2,00 | #NUL! | #NUL! | #NUL! | 2,00 | #NUL! | #NUL! | #NUL! |
| #NUL!  | 1,00 | 1,00  | #NUL! | 74,00 | 2,00 | #NUL! | #NUL! | #NUL! |

| IT   | severite_ITAvk | aspegic | lasilix | IEC   | ARRET_IEC | BETABLOQ | ARRET_BB   |
|------|----------------|---------|---------|-------|-----------|----------|------------|
| 1,00 | 1,00           | #NUL!   | #NUL!   | #NUL! | #NUL!     | #NUL!    | #NUL!      |
| 2,00 | 2,00           | 1,00    | 2,00    | 1,00  | 2,00      | #NUL!    | 2,00 #NUL! |
| 1,00 | 3,00           | 2,00    | 2,00    | 1,00  | 2,00      | #NUL!    | 2,00 #NUL! |
| 1,00 | 4,00           | 1,00    | 2,00    | 1,00  | 2,00      | #NUL!    | 2,00 #NUL! |
| 1,00 | 3,00           | 2,00    | 2,00    | 2,00  | 2,00      | #NUL!    | 2,00 #NUL! |
| 1,00 | 2,00           | 2,00    | 2,00    | 1,00  | 2,00      | #NUL!    | 2,00 #NUL! |
| 1,00 | 4,00           | 2,00    | 2,00    | 2,00  | 2,00      | #NUL!    | 2,00 #NUL! |
| 1,00 | 4,00           | 2,00    | 1,00    | 2,00  | 1,00      | 20,00    | 1,00 2,00  |
| 1,00 | 3,00           | 2,00    | 2,00    | 2,00  | 2,00      | #NUL!    | 2,00 #NUL! |
| 1,00 | 3,00           | 2,00    | 2,00    | 1,00  | 2,00      | #NUL!    | 1,00 2,00  |
| 1,00 | 2,00           | 1,00    | 2,00    | 1,00  | 2,00      | #NUL!    | 1,00 1,00  |
| 1,00 | 33,00          | 1,00    | 2,00    | 1,00  | 2,00      | #NUL!    | 1,00 #NUL! |
| 1,00 | 4,00           | 2,00    | 2,00    | 2,00  | 2,00      | #NUL!    | 1,00 #NUL! |
| 1,00 | 4,00           | 2,00    | 2,00    | #NUL! | 2,00      | #NUL!    | 2,00 #NUL! |
| 1,00 | 3,00           | 2,00    | 2,00    | 2,00  | 2,00      | #NUL!    | 2,00 #NUL! |
| 2,00 | #NUL!          | 2,00    | #NUL!   | 2,00  | 2,00      | #NUL!    | 2,00 #NUL! |
| 2,00 | #NUL!          | 2,00    | 2,00    | 2,00  | 2,00      | #NUL!    | 2,00 #NUL! |
| 1,00 | 3,00           | 2,00    | 2,00    | 1,00  | 2,00      | #NUL!    | 2,00 #NUL! |
| 1,00 | 3,00           | 1,00    | 2,00    | 1,00  | 2,00      | #NUL!    | 1,00 #NUL! |
| 1,00 | 2,00           | 2,00    | 2,00    | 1,00  | 2,00      | #NUL!    | 2,00 #NUL! |
| 1,00 | 3,00           | 2,00    | 2,00    | 2,00  | 2,00      | #NUL!    | 2,00 #NUL! |
| 1,00 | 3,00           | 1,00    | 1,00    | 2,00  | 2,00      | #NUL!    | 1,00 2,00  |
| 1,00 | 4,00           | 1,00    | 2,00    | 2,00  | 2,00      | #NUL!    | 2,00 #NUL! |
| 1,00 | 4,00           | 2,00    | 2,00    | 1,00  | 2,00      | #NUL!    | 2,00 #NUL! |
| 1,00 | 3,00           | 2,00    | 2,00    | 1,00  | 2,00      | #NUL!    | 2,00 #NUL! |
| 1,00 | 2,00           | 2,00    | 2,00    | 2,00  | 2,00      | #NUL!    | 2,00 #NUL! |
| 1,00 | 3,00           | 2,00    | 2,00    | 2,00  | 2,00      | #NUL!    | 2,00 #NUL! |
| 1,00 | 2,00           | 2,00    | 2,00    | 2,00  | 2,00      | #NUL!    | 2,00 #NUL! |
| 1,00 | 3,00           | 2,00    | 2,00    | 2,00  | 2,00      | #NUL!    | 2,00 #NUL! |
| 1,00 | 3,00           | 1,00    | 2,00    | 1,00  | 1,00      | 25,00    | 2,00 #NUL! |
| 1,00 | 3,00           | 2,00    | 2,00    | 1,00  | 2,00      | #NUL!    | 2,00 #NUL! |
| 1,00 | 3,00           | 1,00    | 2,00    | 1,00  | 1,00      | 1,00     | 1,00 1,00  |
| 1,00 | 4,00           | 2,00    | 2,00    | 1,00  | 2,00      | #NUL!    | 1,00 #NUL! |
| 1,00 | 4,00           | 2,00    | 2,00    | 2,00  | 2,00      | #NUL!    | 2,00 #NUL! |
| 1,00 | 3,00           | 2,00    | 2,00    | 2,00  | 2,00      | #NUL!    | 2,00 #NUL! |
| 1,00 | 3,00           | 1,00    | 2,00    | 1,00  | 2,00      | #NUL!    | 2,00 #NUL! |
| 1,00 | 2,00           | 2,00    | 2,00    | 1,00  | 2,00      | #NUL!    | 1,00 #NUL! |
| 1,00 | 2,00           | 2,00    | 2,00    | 1,00  | 2,00      | #NUL!    | 2,00 #NUL! |
| 1,00 | 3,00           | 1,00    | 2,00    | 1,00  | 2,00      | #NUL!    | 2,00 #NUL! |
| 1,00 | 3,00           | 1,00    | 2,00    | 1,00  | 2,00      | #NUL!    | 1,00 1,00  |
| 1,00 | 3,00           | 1,00    | 2,00    | 2,00  | 2,00      | #NUL!    | 2,00 #NUL! |
| 1,00 | 2,00           | 2,00    | 2,00    | 1,00  | 2,00      | #NUL!    | 1,00 2,00  |
| 1,00 | 3,00           | 2,00    | 2,00    | 1,00  | 2,00      | #NUL!    | 2,00 #NUL! |
| 1,00 | 4,00           | 2,00    | 2,00    | 2,00  | 2,00      | #NUL!    | 2,00 #NUL! |
| 1,00 | 1,00           | 2,00    | 2,00    | 1,00  | 2,00      | #NUL!    | 2,00 #NUL! |
| 1,00 | 4,00           | 2,00    | 2,00    | 2,00  | 2,00      | #NUL!    | 2,00 #NUL! |
| 1,00 | 2,00           | 1,00    | 2,00    | 2,00  | 2,00      | #NUL!    | 2,00 #NUL! |
| 1,00 | 1,00           | 2,00    | 2,00    | 2,00  | 2,00      | #NUL!    | 2,00 #NUL! |
| 1,00 | 3,00           | 2,00    | 2,00    | 1,00  | 2,00      | #NUL!    | 2,00 #NUL! |

|      |      |      |       |       |       |       |      |       |
|------|------|------|-------|-------|-------|-------|------|-------|
| 1,00 | 1,00 | 1,00 | 2,00  | 1,00  | 2,00  | #NUL! | 2,00 | #NUL! |
| 1,00 | 3,00 | 2,00 | 2,00  | 2,00  | 2,00  | #NUL! | 2,00 | #NUL! |
| 1,00 | 4,00 | 2,00 | 2,00  | 1,00  | 2,00  | #NUL! | 2,00 | #NUL! |
| 1,00 | 3,00 | 2,00 | 2,00  | 1,00  | 1,00  | 1,00  | 2,00 | #NUL! |
| 1,00 | 3,00 | 2,00 | 2,00  | 2,00  | 2,00  | #NUL! | 2,00 | #NUL! |
| 1,00 | 3,00 | 1,00 | 2,00  | 2,00  | 2,00  | #NUL! | 1,00 | 2,00  |
| 1,00 | 4,00 | 1,00 | 2,00  | #NUL! | #NUL! | #NUL! | 2,00 | #NUL! |
| 1,00 | 4,00 | 2,00 | 2,00  | 1,00  | 2,00  | #NUL! | 2,00 | #NUL! |
| 1,00 | 3,00 | 2,00 | #NUL! | 1,00  | 2,00  | #NUL! | 2,00 | #NUL! |
| 1,00 | 4,00 | 1,00 | 2,00  | 1,00  | 2,00  | #NUL! | 2,00 | #NUL! |
| 1,00 | 4,00 | 2,00 | 2,00  | 2,00  | 2,00  | #NUL! | 2,00 | #NUL! |



| GROSSESI | TERME_GY | TERME_CA | GROSSESI | TERMEACC | VOIEBASSE | BASSE_DE | BASSE_FOI | CESARENN |
|----------|----------|----------|----------|----------|-----------|----------|-----------|----------|
| #NUL!    | #NUL!    | #NUL!    | #NUL!    | 38,00    | 2,00      | 2,00     | 2,00      | 1,00     |
| 1,00     | 10,00    | 10,00    | 2,00     | 37,00    | 2,00      | 2,00     | 2,00      | 1,00     |
| 1,00     | 9,00     | 27,00    | 2,00     | 39,00    | 1,00      | 2,00     | 2,00      | #NUL!    |
| 1,00     | #NUL!    | #NUL!    | 2,00     | 38,00    | 2,00      | 2,00     | 2,00      | 1,00     |
| 1,00     | 6,00     | 16,00    | 1,00     | 30,00    | 2,00      | 2,00     | 2,00      | 1,00     |
| 1,00     | #NUL!    | 25,00    | 2,00     | 38,00    | 2,00      | 2,00     | 2,00      | 2,00     |
| 1,00     | 8,00     | 28,00    | 2,00     | 38,00    | 1,00      | 2,00     | 2,00      | #NUL!    |
| 1,00     | 8,00     | 18,00    | 2,00     | 37,00    | 2,00      | 2,00     | 2,00      | 1,00     |
| 2,00     | #NUL!    | #NUL!    | 2,00     | 39,00    | 2,00      | 2,00     | 2,00      | 1,00     |
| 1,00     | 9,00     | 10,00    | 2,00     | 41,00    | 1,00      | 2,00     | 2,00      | 2,00     |
| 1,00     | 8,00     | 8,00     | 2,00     | 39,00    | 2,00      | 2,00     | 2,00      | 2,00     |
| 1,00     | 8,00     | 26,00    | 2,00     | 35,00    | 2,00      | 2,00     | 2,00      | 1,00     |
| 1,00     | 8,00     | 26,00    | 2,00     | 38,00    | 1,00      | 2,00     | 2,00      | #NUL!    |
| #NUL!    | #NUL!    | #NUL!    | #NUL!    | #NUL!    | 2,00      | 2,00     | 2,00      | 1,00     |
| 1,00     | #NUL!    | #NUL!    | 2,00     | 38,00    | 1,00      | 2,00     | 2,00      | #NUL!    |
| 1,00     | #NUL!    | 3,00     | 2,00     | 38,00    | 2,00      | 2,00     | 2,00      | 1,00     |
| 1,00     | 8,00     | 19,00    | 2,00     | 38,00    | 2,00      | 2,00     | 2,00      | 1,00     |
| 1,00     | 10,00    | 32,00    | 2,00     | 38,00    | 1,00      | 2,00     | 2,00      | #NUL!    |
| 1,00     | 8,00     | 26,00    | 2,00     | 37,00    | 1,00      | 2,00     | 2,00      | #NUL!    |
| 1,00     | 8,00     | 9,00     | 2,00     | 33,00    | 2,00      | 2,00     | 2,00      | 1,00     |
| 1,00     | #NUL!    | #NUL!    | 2,00     | 38,00    | 2,00      | 2,00     | 2,00      | 1,00     |
| 1,00     | #NUL!    | 32,00    | 2,00     | 39,00    | 2,00      | 2,00     | 2,00      | 1,00     |
| 1,00     | #NUL!    | #NUL!    | 2,00     | 39,00    | 2,00      | 2,00     | 2,00      | 1,00     |
| 2,00     | 12,00    | 30,00    | 2,00     | 38,00    | 1,00      | 2,00     | 2,00      | #NUL!    |
| 1,00     | 8,00     | 12,00    | 2,00     | 38,00    | 2,00      | 2,00     | 2,00      | 1,00     |
| 1,00     | 6,00     | #NUL!    | 2,00     | 38,00    | 1,00      | 2,00     | 2,00      | #NUL!    |
| 1,00     | 9,00     | 38,00    | 2,00     | 37,00    | 2,00      | 2,00     | 2,00      | 1,00     |
| 1,00     | #NUL!    | #NUL!    | 2,00     | 39,00    | 1,00      | 2,00     | 2,00      | 3,00     |
| 1,00     | 8,00     | 28,00    | 2,00     | 38,00    | 2,00      | 1,00     | 2,00      | #NUL!    |
| 2,00     | #NUL!    | #NUL!    | 2,00     | 38,00    | 1,00      | 2,00     | 2,00      | #NUL!    |
| 2,00     | 26,00    | 26,00    | 2,00     | 38,00    | 1,00      | 2,00     | 2,00      | #NUL!    |
| 2,00     | 25,00    | 29,00    | 2,00     | 35,00    | 2,00      | 2,00     | 2,00      | 1,00     |
| 2,00     | #NUL!    | #NUL!    | 2,00     | 36,00    | 2,00      | 2,00     | 2,00      | 1,00     |
| 1,00     | #NUL!    | #NUL!    | 2,00     | 39,00    | 1,00      | 2,00     | 2,00      | 2,00     |
| 2,00     | #NUL!    | #NUL!    | 2,00     | 38,00    | 1,00      | 2,00     | 2,00      | #NUL!    |
| 1,00     | 12,00    | 25,00    | 2,00     | 39,00    | 2,00      | 2,00     | 2,00      | 1,00     |
| 1,00     | 8,00     | 33,00    | 2,00     | 34,00    | 2,00      | 2,00     | 2,00      | 1,00     |
| 1,00     | 10,00    | 22,00    | 2,00     | 35,00    | 2,00      | 2,00     | 2,00      | 1,00     |
| 2,00     | #NUL!    | #NUL!    | 2,00     | 38,00    | 2,00      | 2,00     | 2,00      | 1,00     |
| 1,00     | 8,00     | 12,00    | 2,00     | 38,00    | 2,00      | 2,00     | 2,00      | 1,00     |
| 1,00     | 8,00     | 15,00    | 2,00     | 37,00    | 2,00      | 2,00     | 2,00      | 1,00     |
| 1,00     | 10,00    | 30,00    | 2,00     | 39,00    | 1,00      | 2,00     | 2,00      | 3,00     |
| 1,00     | 2,00     | 9,00     | 2,00     | 38,00    | 2,00      | 2,00     | 2,00      | 1,00     |
| 1,00     | #NUL!    | #NUL!    | 2,00     | 38,00    | 2,00      | 2,00     | 2,00      | 1,00     |
| 1,00     | #NUL!    | #NUL!    | 2,00     | 35,00    | 2,00      | 2,00     | 2,00      | 1,00     |
| 1,00     | 12,00    | 20,00    | 2,00     | 38,00    | 2,00      | 2,00     | 2,00      | 1,00     |
| 1,00     | #NUL!    | #NUL!    | 2,00     | 40,00    | 2,00      | 2,00     | 2,00      | 1,00     |
| 1,00     | #NUL!    | #NUL!    | 2,00     | 39,00    | 2,00      | 2,00     | 2,00      | 1,00     |
| 1,00     | 12,00    | 16,00    | 2,00     | 37,00    | 1,00      | 2,00     | 2,00      | #NUL!    |

|       |       |       |       |       |       |       |       |       |
|-------|-------|-------|-------|-------|-------|-------|-------|-------|
| 1,00  | #NUL! | #NUL! | 2,00  | 35,00 | 2,00  | 2,00  | 2,00  | 1,00  |
| 1,00  | 8,00  | 28,00 | 2,00  | 35,00 | 2,00  | 2,00  | 2,00  | 1,00  |
| 1,00  | 9,00  | 9,00  | 2,00  | 35,00 | 2,00  | 2,00  | 2,00  | 1,00  |
| 1,00  | 9,00  | 29,00 | 2,00  | 39,00 | 1,00  | 2,00  | 2,00  | #NUL! |
| 1,00  | 6,00  | #NUL! | 2,00  | 2,00  | 2,00  | 2,00  | 2,00  | 1,00  |
| 2,00  | #NUL! | #NUL! | 2,00  | 39,00 | 2,00  | 2,00  | 2,00  | 1,00  |
| #NUL! | #NUL! | #NUL! | #NUL! | #NUL! | #NUL! | #NUL! | #NUL! | #NUL! |
| 1,00  | 9,00  | 33,00 | 2,00  | 37,00 | 2,00  | 2,00  | 2,00  | 1,00  |
| 1,00  | 10,00 | 12,00 | 2,00  | 39,00 | 1,00  | 2,00  | 2,00  | 2,00  |
| 2,00  | #NUL! | #NUL! | #NUL! | 35,00 | 2,00  | 2,00  | 2,00  | 1,00  |
| 1,00  | 9,00  | 28,00 | 2,00  | 37,00 | 2,00  | 2,00  | 2,00  | 1,00  |

| INDICATIO    | anesthesie | DELIVRANC | (DUREE_HC | SEXE_NN | POIDS_NA | APGAR | comemnta    | CPC_MATE |
|--------------|------------|-----------|-----------|---------|----------|-------|-------------|----------|
|              | #NUL!      | #NUL!     | #NUL!     | #NUL!   | #NUL!    | #NUL! |             | #NUL!    |
| htap cardia  | 2,00       | 33,00     | 5,00      | 2,00    | 3000     | 8,00  |             | 1,00     |
|              | #NUL!      | #NUL!     | 3,00      | 2,00    | 3400     | 9,00  |             | 1,00     |
| thrombopé    | 1,00       | 3,00      | 18,00     | 1,00    | 3400     | 9,00  |             | 1,00     |
| premat HT    | 1,00       | 3,00      | 16,00     | 2,00    | 1500     | 8,00  |             | 2,00     |
| UC+valvulc   | 2,00       | 2,00      | 7,00      | 2,00    | 2950     | 9,00  |             | 1,00     |
|              | 2,00       | 2,00      | 3,00      | 2,00    | 3000     | 9,00  |             | 2,00     |
| rao serré c  | 2,00       | 3,00      | 6,00      | 2,00    | 3200     | 9,00  |             | 2,00     |
| HTAP RM S    | 2,00       | 3,00      | 3,00      | 1,00    | 3000     | 9,00  |             | 2,00     |
|              | 2,00       | 1,00      | 2,00      | 2,00    | 3200     | 9,00  |             | 1,00     |
| uterus cica  | #NUL!      | #NUL!     | #NUL!     | #NUL!   | #NUL!    | #NUL! |             | #NUL!    |
| rm serré hi  | 1,00       | 1,00      | 7,00      | 2,00    | 3100     | 8,00  |             | 1,00     |
|              | #NUL!      | #NUL!     | 3,00      | 1,00    | 3070     | 9,00  |             | 2,00     |
| RAao serré   | 2,00       | 3,00      | 3,00      | 2,00    | 3200     | 9,00  |             | 1,00     |
|              | #NUL!      | #NUL!     | 3,00      | 2,00    | 3100     | 9,00  |             | 2,00     |
| uterux bici  | 1,00       | 3,00      | 3,00      | 1,00    | 3750     | 5,00  | cyanose, b  | 2,00     |
| RP tres ser  | 2,00       | 3,00      | 3,00      | 2,00    | 3200     | 9,00  |             | 2,00     |
|              | #NUL!      | 2,00      | 2,00      | 2,00    | 3300     | 9,00  |             | 1,00     |
|              | #NUL!      | #NUL!     | 8,00      | 2,00    | 2400     | 8,00  |             | 1,00     |
| travail+dec  | 2,00       | 3,00      | 4,00      | 1,00    | 2000     | 8,00  |             | 1,00     |
| uterus bici  | 1,00       | 3,00      | 3,00      | 2,00    | 3100     | 9,00  |             | 2,00     |
| RM+HTAP      | 1,00       | 3,00      | 15,00     | 2,00    | 2500     | 9,00  |             | 1,00     |
| RM+HTAP      | 2,00       | 3,00      | 7,00      | 1,00    | 3100     | 9,00  |             | 2,00     |
|              | 2,00       | 2,00      | 3,00      | 2,00    | 3000     | 9,00  |             | 2,00     |
| htap rm se   | 2,00       | 3,00      | 3,00      | 2,00    | 3200     | 9,00  |             | 2,00     |
|              | #NUL!      | #NUL!     | #NUL!     | 2,00    | 3000     | 9,00  |             | 1,00     |
| htap         | 2,00       | 2,00      | 4,00      | 2,00    | 2400     | 8,00  | puis10/10   | 2,00     |
|              | #NUL!      | #NUL!     | 14,00     | 2,00    | 2200     | 9,00  |             | 1,00     |
|              | #NUL!      | 2,00      | 3,00      | 2,00    | 3100     | 9,00  |             | 1,00     |
|              | #NUL!      | #NUL!     | 6,00      | 1,00    | 3000     | 9,00  |             | 1,00     |
|              | #NUL!      | #NUL!     | 3,00      | 2,00    | 2750     | 9,00  |             | 1,00     |
| cicatricel+f | 2,00       | 3,00      | 8,00      | 2,00    | 2900     | 8,00  |             | 1,00     |
| RA tres ser  | 1,00       | 3,00      | 4,00      | 1,00    | 3000     | 9,00  |             | 1,00     |
|              | #NUL!      | #NUL!     | #NUL!     | 1,00    | 3000     | 9,00  |             | 2,00     |
|              | #NUL!      | #NUL!     | 3,00      | 2,00    | 3000     | 9,00  |             | 2,00     |
| rm htap      | 2,00       | 3,00      | 8,00      | 1,00    | 2500     | 8,00  |             | 1,00     |
| RPM souffi   | 2,00       | 3,00      | 10,00     | 2,00    | 2300     | 5,00  |             | 1,00     |
| RM serré f   | 2,00       | 3,00      | 5,00      | 2,00    | 2400     | 8,00  |             | 2,00     |
| htap         | 22,00      | 2,00      | 8,00      | 2,00    | 2500     | 8,00  |             | 1,00     |
| rm serré ra  | 2,00       | 3,00      | 6,00      | 2,00    | 3200     | 8,00  |             | 1,00     |
| rm serre +l  | 2,00       | 2,00      | 3,00      | 1,00    | 2800     | 9,00  |             | 2,00     |
|              | #NUL!      | #NUL!     | 3,00      | 1,00    | 3000     | 9,00  |             | 1,00     |
| valvulopatf  | 2,00       | 3,00      | 3,00      | 2,00    | 2600     | 7,00  |             | 1,00     |
| RM serré +   | 2,00       | 33,00     | 3,00      | 1,00    | 3500     | 9,00  |             | 2,00     |
| RM serre     | 2,00       | 3,00      | 6,00      | 2,00    | 2600     | 6,00  |             | 2,00     |
| RM serre f   | 2,00       | 3,00      | 3,00      | 2,00    | 3000     | 9,00  |             | 1,00     |
| SFA, rm se:  | 1,00       | 3,00      | 6,00      | 1,00    | 3100     | 8,00  |             | 1,00     |
| rao serre b  | 1,00       | 3,00      | 4,00      | 2,00    | 3000     | 8,00  | 8 puis 9/10 | 2,00     |
|              | #NUL!      | #NUL!     | 5,00      | 2,00    | 2400     | 9,00  |             | 1,00     |

|             |       |       |       |       |       |                  |       |
|-------------|-------|-------|-------|-------|-------|------------------|-------|
| uterus bica | 2,00  | 3,00  | 4,00  | 1,00  | 2400  | 3,00 3/10 puis 9 | 1,00  |
| HTAP Rm s   | 2,00  | 3,00  | 5,00  | 2,00  | 2200  | 8,00             | 1,00  |
| souffrance  | 2,00  | 3,00  | 6,00  | 1,00  | 2300  | 7,00             | 1,00  |
|             | #NUL! | #NUL! | 3,00  | 2,00  | 3600  | 9,00             | 2,00  |
| htap        | 2,00  | 2,00  | 3,00  | 1,00  | 2400  | 9,00             | 1,00  |
| Rao serré s | 2,00  | 3,00  | 5,00  | 2,00  | 2500  | 9,00             | 2,00  |
|             | #NUL! | #NUL! | #NUL! | #NUL! | #NUL! | #NUL!            | #NUL! |
| RM serré F  | 2,00  | 3,00  | 3,00  | 2,00  | 2500  | 9,00             | 1,00  |
|             | 2,00  | 1,00  | 3,00  | 1,00  | 2000  | 8,00             | 2,00  |
| im importa  | 2,00  | 3,00  | 15,00 | 1,00  | 2200  | 8,00             | 1,00  |
| rao serré s | 2,00  | 3,00  | 3,00  | 2,00  | 3200  | 9,00             | 2,00  |

| HOSP_CAR | cpc   | postpar | TERME_HC | DECOMP_ | TERME_DE | ENDOCARI | TERME_EI | CPC_HEM | TERME_HE |
|----------|-------|---------|----------|---------|----------|----------|----------|---------|----------|
| 1,00     | #NUL! |         | 35,00    | 1,00    | 1,00     | 2,00     | #NUL!    | 2,00    | #NUL!    |
| 2,00     | #NUL! |         | #NUL!    | 2,00    | #NUL!    | 1,00     | 33,00    | 2,00    | #NUL!    |
| 1,00     | #NUL! |         | 27,00    | 1,00    | 27,00    | 2,00     | #NUL!    | 2,00    | #NUL!    |
| 1,00     | #NUL! |         | #NUL!    | 1,00    | 1,00     | 2,00     | #NUL!    | 2,00    | #NUL!    |
| 2,00     | #NUL! |         | #NUL!    | 1,00    | 27,00    | 2,00     | #NUL!    | 2,00    | #NUL!    |
| 1,00     | #NUL! |         | 25,00    | 1,00    | 25,00    | 2,00     | #NUL!    | 2,00    | #NUL!    |
| 2,00     | #NUL! |         | #NUL!    | 2,00    | #NUL!    | 2,00     | #NUL!    | 2,00    | #NUL!    |
| 2,00     | 2,00  |         | #NUL!    | 2,00    | #NUL!    | 2,00     | #NUL!    | 2,00    | #NUL!    |
| 2,00     | #NUL! |         | #NUL!    | 2,00    | #NUL!    | 2,00     | #NUL!    | 2,00    | #NUL!    |
| 1,00     | #NUL! |         | 36,00    | 1,00    | 36,00    | 2,00     | #NUL!    | 2,00    | #NUL!    |
| #NUL!    | #NUL! |         | #NUL!    | #NUL!   | #NUL!    | #NUL!    | #NUL!    | #NUL!   | #NUL!    |
| 1,00     | #NUL! |         | #NUL!    | 1,00    | #NUL!    | 2,00     | #NUL!    | 2,00    | #NUL!    |
| 2,00     | #NUL! |         | #NUL!    | 2,00    | #NUL!    | 2,00     | #NUL!    | 2,00    | #NUL!    |
| 1,00     | #NUL! |         | 22,00    | 1,00    | 22,00    | 2,00     | #NUL!    | 2,00    | #NUL!    |
| 2,00     | #NUL! |         | #NUL!    | 2,00    | #NUL!    | 2,00     | #NUL!    | 2,00    | #NUL!    |
| 2,00     | #NUL! |         | #NUL!    | 2,00    | 2,00     | 2,00     | #NUL!    | 2,00    | #NUL!    |
| 2,00     | 2,00  |         | 2,00     | 2,00    | #NUL!    | 2,00     | #NUL!    | 2,00    | #NUL!    |
| 1,00     | #NUL! |         | 32,00    | 1,00    | 32,00    | 2,00     | #NUL!    | 2,00    | #NUL!    |
| 1,00     | 2,00  |         | 26,00    | 1,00    | 26,00    | 2,00     | #NUL!    | 2,00    | #NUL!    |
| 2,00     | #NUL! |         | #NUL!    | 1,00    | 32,00    | 2,00     | #NUL!    | 2,00    | #NUL!    |
| 2,00     | #NUL! |         | #NUL!    | 2,00    | #NUL!    | 2,00     | #NUL!    | 2,00    | #NUL!    |
| 1,00     | #NUL! |         | 32,00    | 1,00    | 32,00    | 2,00     | #NUL!    | 2,00    | #NUL!    |
| 2,00     | #NUL! |         | #NUL!    | 2,00    | #NUL!    | 2,00     | #NUL!    | 2,00    | #NUL!    |
| 1,00     | 2,00  |         | 30,00    | 1,00    | 30,00    | 2,00     | #NUL!    | 2,00    | #NUL!    |
| 2,00     | #NUL! |         | #NUL!    | 2,00    | #NUL!    | 2,00     | #NUL!    | 2,00    | #NUL!    |
| 1,00     | 1,00  |         | #NUL!    | 1,00    | #NUL!    | 2,00     | #NUL!    | 2,00    | #NUL!    |
| 1,00     | #NUL! |         | #NUL!    | 1,00    | 36,00    | 2,00     | #NUL!    | 2,00    | #NUL!    |
| 1,00     | #NUL! |         | #NUL!    | 1,00    | #NUL!    | 2,00     | #NUL!    | 2,00    | #NUL!    |
| 1,00     | #NUL! |         | #NUL!    | 1,00    | 28,00    | 2,00     | #NUL!    | 2,00    | #NUL!    |
| 1,00     | #NUL! |         | 25,00    | 1,00    | 25,00    | 2,00     | #NUL!    | 2,00    | #NUL!    |
| 1,00     | #NUL! |         | 26,00    | 1,00    | 26,00    | 2,00     | #NUL!    | 2,00    | #NUL!    |
| 1,00     | #NUL! |         | 29,00    | 1,00    | 29,00    | 2,00     | #NUL!    | 1,00    | #NUL!    |
| 1,00     | 1,00  |         | 37,00    | 1,00    | #NUL!    | 2,00     | #NUL!    | 2,00    | #NUL!    |
| 2,00     | #NUL! |         | #NUL!    | 2,00    | #NUL!    | 2,00     | #NUL!    | 2,00    | #NUL!    |
| 2,00     | #NUL! |         | #NUL!    | 2,00    | #NUL!    | 2,00     | #NUL!    | 2,00    | #NUL!    |
| 1,00     | #NUL! |         | 32,00    | 1,00    | 33,00    | 2,00     | #NUL!    | 2,00    | #NUL!    |
| 1,00     | 2,00  |         | 33,00    | 1,00    | 33,00    | 2,00     | #NUL!    | 2,00    | #NUL!    |
| 2,00     | #NUL! |         | #NUL!    | 2,00    | #NUL!    | 2,00     | #NUL!    | 2,00    | #NUL!    |
| 1,00     | #NUL! |         | 29,00    | 1,00    | 29,00    | 2,00     | #NUL!    | 2,00    | #NUL!    |
| 1,00     | #NUL! |         | 30,00    | 1,00    | 30,00    | 2,00     | #NUL!    | 2,00    | #NUL!    |
| 2,00     | #NUL! |         | #NUL!    | 2,00    | #NUL!    | 2,00     | #NUL!    | 2,00    | #NUL!    |
| 1,00     | #NUL! |         | 32,00    | 1,00    | 32,00    | 2,00     | #NUL!    | 2,00    | #NUL!    |
| 1,00     | #NUL! |         | 37,00    | 1,00    | 37,00    | 2,00     | #NUL!    | 2,00    | #NUL!    |
| 2,00     | #NUL! |         | #NUL!    | 2,00    | #NUL!    | 2,00     | #NUL!    | 2,00    | #NUL!    |
| 1,00     | #NUL! |         | #NUL!    | 1,00    | 35,00    | 2,00     | #NUL!    | 2,00    | #NUL!    |
| 1,00     | #NUL! |         | 22,00    | 1,00    | 22,00    | 2,00     | #NUL!    | 2,00    | #NUL!    |
| 1,00     | #NUL! |         | 38,00    | 1,00    | #NUL!    | 2,00     | #NUL!    | 2,00    | #NUL!    |
| 2,00     | #NUL! |         | #NUL!    | 2,00    | #NUL!    | 2,00     | #NUL!    | 2,00    | #NUL!    |
| 1,00     | #NUL! |         | 17,00    | 1,00    | 17,00    | 2,00     | #NUL!    | 2,00    | #NUL!    |

|       |       |       |       |       |       |       |       |       |
|-------|-------|-------|-------|-------|-------|-------|-------|-------|
| 1,00  | #NUL! | 35,00 | 1,00  | 35,00 | 22,00 | #NUL! | 2,00  | #NUL! |
| 1,00  | #NUL! | 28,00 | 1,00  | 28,00 | 2,00  | #NUL! | 2,00  | #NUL! |
| 1,00  | #NUL! | #NUL! | 1,00  | 29,00 | 2,00  | #NUL! | 2,00  | #NUL! |
| 2,00  | #NUL! | #NUL! | 2,00  | #NUL! | 2,00  | #NUL! | 2,00  | #NUL! |
| 1,00  | 1,00  | #NUL! | 1,00  | #NUL! | 2,00  | #NUL! | 2,00  | #NUL! |
| 2,00  | #NUL! | #NUL! | 2,00  | #NUL! | 2,00  | #NUL! | 2,00  | #NUL! |
| #NUL! | #NUL! | #NUL! | #NUL! | #NUL! | #NUL! | #NUL! | #NUL! | #NUL! |
| 1,00  | #NUL! | #NUL! | 1,00  | 33,00 | 2,00  | #NUL! | 2,00  | #NUL! |
| 2,00  | #NUL! | #NUL! | 2,00  | #NUL! | 2,00  | #NUL! | 2,00  | #NUL! |
| 1,00  | #NUL! | 35,00 | 1,00  | 35,00 | 2,00  | #NUL! | 2,00  | #NUL! |
| 2,00  | #NUL! | #NUL! | 2,00  | #NUL! | 2,00  | #NUL! | 2,00  | #NUL! |



|       |       |       |       |       |       |       |       |       |
|-------|-------|-------|-------|-------|-------|-------|-------|-------|
| 2,00  | #NUL! | 2,00  | #NUL! | 1,00  | 2,00  | 2,00  | 1,00  | 2,00  |
| 2,00  | #NUL! | 2,00  | #NUL! | 2,00  | 2,00  | 2,00  | 2,00  | 2,00  |
| 2,00  | #NUL! | 2,00  | #NUL! | 1,00  | 2,00  | 2,00  | 1,00  | 2,00  |
| 2,00  | #NUL! | 2,00  | #NUL! | 2,00  | 2,00  | 2,00  | 2,00  | 2,00  |
| 2,00  | #NUL! | 2,00  | #NUL! | 2,00  | 2,00  | 2,00  | 2,00  | 2,00  |
| 2,00  | #NUL! | 2,00  | #NUL! | 1,00  | 2,00  | 2,00  | 1,00  | 2,00  |
| #NUL! | #NUL! | #NUL! | #NUL! | #NUL! | #NUL! | #NUL! | #NUL! | #NUL! |
| 2,00  | #NUL! | 2,00  | #NUL! | 2,00  | 2,00  | 2,00  | 2,00  | 2,00  |
| 2,00  | #NUL! | 2,00  | #NUL! | 2,00  | 2,00  | 2,00  | 2,00  | 2,00  |
| 2,00  | #NUL! | 2,00  | #NUL! | 1,00  | 2,00  | 2,00  | 1,00  | 2,00  |
| 2,00  | #NUL! | 2,00  | #NUL! | 2,00  | 2,00  | 2,00  | 2,00  | 2,00  |





|       |       |       |       |       |       |       |       |       |
|-------|-------|-------|-------|-------|-------|-------|-------|-------|
| 2,00  | 2,00  | 2,00  | #NUL! | 1,00  | 2,00  | 2,00  | 1,00  | 2,00  |
| 2,00  | 2,00  | 2,00  | #NUL! | 1,00  | 2,00  | 1,00  | 1,00  | 2,00  |
| 2,00  | 2,00  | 2,00  | #NUL! | 1,00  | 2,00  | 1,00  | 1,00  | 2,00  |
| 2,00  | 2,00  | 2,00  | #NUL! | 2,00  | 2,00  | 2,00  | 2,00  | 2,00  |
| 2,00  | 2,00  | 2,00  | #NUL! | 1,00  | 2,00  | 1,00  | 2,00  | 2,00  |
| 2,00  | 2,00  | 2,00  | #NUL! | 1,00  | 2,00  | 1,00  | 2,00  | 2,00  |
| #NUL! | #NUL! | #NUL! | #NUL! | #NUL! | #NUL! | #NUL! | #NUL! | #NUL! |
| 2,00  | 2,00  | 2,00  | #NUL! | 1,00  | 2,00  | 1,00  | 2,00  | 2,00  |
| 2,00  | 2,00  | 2,00  | #NUL! | 1,00  | 2,00  | 1,00  | 2,00  | 2,00  |
| 2,00  | 2,00  | 2,00  | #NUL! | 1,00  | 2,00  | 2,00  | 1,00  | 2,00  |
| 2,00  | 2,00  | 2,00  | #NUL! | 2,00  | 2,00  | 2,00  | 2,00  | 2,00  |

| HOSPENNE CAUSE1 | DMPCPENICI_dmpc | TERME_DMSM_AVT   | SM_APRES CPC_DMP(CARRET_AV         |
|-----------------|-----------------|------------------|------------------------------------|
| 2,00            | #NUL!           | 2,00             | #NUL! #NUL! #NUL! #NUL! #NUL!      |
| 2,00            | #NUL!           | #NUL!            | #NUL! #NUL! #NUL! #NUL! 1,00       |
| 2,00            | #NUL!           | #NUL!            | #NUL! #NUL! #NUL! #NUL! #NUL!      |
| 2,00            | #NUL!           | 2,00 calcication | #NUL! #NUL! #NUL! #NUL! 1,00       |
| 1,00            | #NUL!           | 1,00             | 29,00 1,20 1,50 1,00 #NUL!         |
| 2,00            | #NUL!           | 2,00             | #NUL! #NUL! #NUL! #NUL! 1,00       |
| 2,00            | #NUL!           | #NUL!            | #NUL! #NUL! #NUL! #NUL! #NUL!      |
| 2,00            | #NUL!           | 2,00             | #NUL! #NUL! #NUL! #NUL! #NUL!      |
| 2,00            | #NUL!           | #NUL!            | #NUL! #NUL! #NUL! #NUL! #NUL!      |
| 2,00            | #NUL!           | 2,00             | #NUL! #NUL! #NUL! #NUL! #NUL!      |
| #NUL!           | #NUL!           | #NUL!            | #NUL! #NUL! #NUL! #NUL! #NUL!      |
| 2,00            | #NUL!           | 2,00 im          | #NUL! #NUL! #NUL! #NUL! #NUL!      |
| 2,00            | #NUL!           | #NUL!            | #NUL! #NUL! #NUL! #NUL! #NUL!      |
| 2,00            | #NUL!           | 2,00             | #NUL! #NUL! #NUL! #NUL! #NUL!      |
| 2,00            | #NUL!           | 2,00             | #NUL! #NUL! #NUL! #NUL! #NUL!      |
| 1,00            | #NUL!           | 2,00             | #NUL! #NUL! #NUL! #NUL! #NUL!      |
| 2,00            | #NUL!           | #NUL!            | #NUL! #NUL! #NUL! #NUL! #NUL!      |
| 2,00            | #NUL!           | 1,00             | 34,00 1,20 1,80 2,00 2,00          |
| 2,00            | #NUL!           | 1,00             | 27,00 1,30 1,60 #NUL! #NUL!        |
| 1,00            | #NUL!           | 2,00 rm entonn   | #NUL! #NUL! #NUL! #NUL! #NUL!      |
| 2,00            | #NUL!           | 2,00             | #NUL! #NUL! #NUL! #NUL! #NUL!      |
| 2,00            | #NUL!           | 2,00 thrombus    | #NUL! #NUL! #NUL! #NUL! 1,00       |
| 2,00            | #NUL!           | 2,00             | #NUL! #NUL! #NUL! #NUL! 1,00       |
| 2,00            | #NUL!           | 1,00             | 30,00 1,20 1,80 2,00 #NUL!         |
| 2,00            | #NUL!           | 2,00 rm entonn   | #NUL! #NUL! #NUL! #NUL! #NUL!      |
| 2,00            | #NUL!           | #NUL!            | #NUL! #NUL! #NUL! #NUL! #NUL!      |
| 2,00            | #NUL!           | 2,00 im importe  | #NUL! #NUL! #NUL! #NUL! #NUL!      |
| 2,00            | #NUL!           | 2,00             | #NUL! #NUL! #NUL! #NUL! #NUL!      |
| 2,00            | #NUL!           | 2,00             | #NUL! #NUL! #NUL! #NUL! #NUL!      |
| 2,00            | #NUL!           | 1,00             | #NUL! 1,10 1,80 2,00 1,00          |
| 2,00            | #NUL!           | 1,00             | 27,00 1,00 1,20 2,00 #NUL!         |
| 2,00            | #NUL!           | 2,00 IM garde II | #NUL! #NUL! #NUL! #NUL! 1,00       |
| 2,00            | #NUL!           | #NUL!            | #NUL! #NUL! #NUL! #NUL! #NUL!      |
| 2,00            | #NUL!           | 2,00             | #NUL! #NUL! #NUL! #NUL! #NUL!      |
| 2,00            | #NUL!           | 1,00             | 29,00 1,00 1,80 2,00 #NUL!         |
| 2,00            | #NUL!           | 2,00 im          | #NUL! #NUL! #NUL! #NUL! #NUL!      |
| 2,00            | #NUL!           | #NUL!            | #NUL! #NUL! #NUL! #NUL! #NUL!      |
| 2,00            | #NUL!           | 2,00 im          | #NUL! #NUL! #NUL! #NUL! #NUL!      |
| 2,00            | #NUL!           | 2,00             | #NUL! #NUL! #NUL! #NUL! 1,00       |
| 2,00            | #NUL!           | 2,00 rm calcifie | #NUL! #NUL! #NUL! #NUL! 1,00       |
| 2,00            | #NUL!           | 2,00 im          | #NUL! #NUL! #NUL! #NUL! 1,00       |
| 2,00            | #NUL!           | 1,00             | 32,00 1,20 1,60 2,00 #NUL!         |
| 2,00            | #NUL!           | 2,00             | #NUL! #NUL! #NUL! #NUL! #NUL!      |
| 2,00            | #NUL!           | 2,00 entonnoir   | #NUL! #NUL! #NUL! #NUL! #NUL!      |
| 2,00            | #NUL!           | 2,00 calcifie    | #NUL! #NUL! #NUL! #NUL! 2,00       |
| 2,00            | #NUL!           | #NUL!            | #NUL! #NUL! #NUL! #NUL! 1,00       |
| 2,00            | #NUL!           | 2,00             | 2,00 #NUL! #NUL! #NUL! #NUL! #NUL! |
| 2,00            | #NUL!           | #NUL!            | #NUL! #NUL! #NUL! #NUL! #NUL!      |
| 2,00            | #NUL!           | 1,00             | 20,00 0,97 2,10 2,00 2,00          |

|       |       |       |              |       |       |       |       |       |
|-------|-------|-------|--------------|-------|-------|-------|-------|-------|
| 2,00  | #NUL! | 2,00  | #NUL!        | #NUL! | #NUL! | #NUL! | #NUL! | 1,00  |
| 2,00  | #NUL! | 2,00  | #NUL!        | #NUL! | #NUL! | #NUL! | #NUL! | #NUL! |
| 1,00  | #NUL! | 2,00  | #NUL!        | #NUL! | #NUL! | #NUL! | #NUL! | #NUL! |
| 2,00  | #NUL! | #NUL! | #NUL!        | #NUL! | #NUL! | #NUL! | #NUL! | #NUL! |
| 2,00  | #NUL! | 2,00  | calcificatio | #NUL! | #NUL! | #NUL! | #NUL! | #NUL! |
| 1,00  | #NUL! | 2,00  |              | #NUL! | #NUL! | #NUL! | #NUL! | 1,00  |
| #NUL! | #NUL! | #NUL! |              | #NUL! | #NUL! | #NUL! | #NUL! | #NUL! |
| 2,00  | #NUL! | 2,00  |              | #NUL! | #NUL! | #NUL! | #NUL! | #NUL! |
| 2,00  | #NUL! | 2,00  |              | #NUL! | #NUL! | #NUL! | #NUL! | #NUL! |
| 2,00  | #NUL! | 2,00  |              | #NUL! | #NUL! | #NUL! | #NUL! | 2,00  |
| 2,00  | #NUL! | #NUL! |              | #NUL! | #NUL! | #NUL! | #NUL! | #NUL! |

| HOSP_CAR | SWITCH_H | SWITCH_H | RPRISE_AV | TRANSFER | GESTION_ / | ALLAITEME | CONTRACE | commenta     |
|----------|----------|----------|-----------|----------|------------|-----------|----------|--------------|
| #NUL!    | #NUL!    | #NUL!    | #NUL!     | #NUL!    | #NUL!      | 2,00      | 2,00     |              |
| 1,00     | 1,00     | 2,00     | 4,00      | 2,00     | 1,00       | 2,00      | 1,00     |              |
| #NUL!    | #NUL!    | #NUL!    | #NUL!     | #NUL!    | #NUL!      | 1,00      | 2,00     |              |
| 1,00     | 1,00     | 2,00     | 15,00     | 1,00     | 2,00       | 1,00      | 1,00     | ligature de  |
| #NUL!    | #NUL!    | #NUL!    | #NUL!     | #NUL!    | #NUL!      | 1,00      | 2,00     | arrest card  |
| 2,00     | 2,00     | 1,00     | 4,00      | 2,00     | 1,00       | 2,00      | #NUL!    |              |
| #NUL!    | #NUL!    | #NUL!    | #NUL!     | #NUL!    | #NUL!      | 1,00      | 1,00     |              |
| #NUL!    | #NUL!    | #NUL!    | #NUL!     | #NUL!    | #NUL!      | 1,00      | 1,00     | calendrier   |
| #NUL!    | #NUL!    | #NUL!    | #NUL!     | #NUL!    | #NUL!      | 1,00      | 1,00     | LIGATURE     |
| #NUL!    | #NUL!    | #NUL!    | #NUL!     | #NUL!    | #NUL!      | 1,00      | #NUL!    |              |
| #NUL!    | #NUL!    | #NUL!    | #NUL!     | #NUL!    | #NUL!      | #NUL!     | #NUL!    |              |
| #NUL!    | #NUL!    | #NUL!    | #NUL!     | #NUL!    | #NUL!      | #NUL!     | #NUL!    |              |
| #NUL!    | #NUL!    | #NUL!    | #NUL!     | #NUL!    | #NUL!      | 2,00      | 2,00     |              |
| 2,00     | #NUL!    | #NUL!    | #NUL!     | #NUL!    | #NUL!      | 1,00      | 1,00     | microprogr   |
| #NUL!    | #NUL!    | #NUL!    | #NUL!     | #NUL!    | #NUL!      | 1,00      | 1,00     |              |
| 2,00     | 2,00     | 2,00     | #NUL!     | 2,00     | #NUL!      | 1,00      | 1,00     | refuse ligat |
| #NUL!    | #NUL!    | #NUL!    | #NUL!     | #NUL!    | #NUL!      | 1,00      | 2,00     |              |
| #NUL!    | #NUL!    | #NUL!    | #NUL!     | #NUL!    | #NUL!      | 1,00      | 2,00     |              |
| 2,00     | 1,00     | 2,00     | 5,00      | 2,00     | 1,00       | 1,00      | 2,00     |              |
| #NUL!    | #NUL!    | #NUL!    | #NUL!     | #NUL!    | #NUL!      | 1,00      | 1,00     |              |
| #NUL!    | #NUL!    | #NUL!    | #NUL!     | #NUL!    | #NUL!      | 1,00      | 1,00     | preservatif  |
| 2,00     | 2,00     | 1,00     | 4,00      | 2,00     | 1,00       | 1,00      | #NUL!    |              |
| 1,00     | 2,00     | 1,00     | 4,00      | 2,00     | 1,00       | 1,00      | 2,00     |              |
| #NUL!    | #NUL!    | #NUL!    | #NUL!     | #NUL!    | #NUL!      | 1,00      | 2,00     |              |
| #NUL!    | #NUL!    | #NUL!    | #NUL!     | #NUL!    | #NUL!      | 1,00      | 1,00     |              |
| #NUL!    | #NUL!    | #NUL!    | #NUL!     | #NUL!    | #NUL!      | 1,00      | 1,00     |              |
| #NUL!    | #NUL!    | #NUL!    | #NUL!     | #NUL!    | #NUL!      | 1,00      | 2,00     |              |
| #NUL!    | #NUL!    | #NUL!    | #NUL!     | #NUL!    | #NUL!      | 1,00      | 1,00     | Meadows      |
| #NUL!    | #NUL!    | #NUL!    | #NUL!     | #NUL!    | #NUL!      | 1,00      | 1,00     |              |
| 1,00     | 2,00     | 1,00     | 4,00      | 2,00     | 1,00       | 1,00      | 1,00     |              |
| #NUL!    | #NUL!    | #NUL!    | #NUL!     | #NUL!    | #NUL!      | 1,00      | 2,00     |              |
| 1,00     | 1,00     | 2,00     | 3,00      | 2,00     | 1,00       | 2,00      | 1,00     |              |
| #NUL!    | #NUL!    | #NUL!    | #NUL!     | #NUL!    | #NUL!      | 1,00      | 1,00     |              |
| #NUL!    | #NUL!    | #NUL!    | #NUL!     | #NUL!    | #NUL!      | 1,00      | 1,00     |              |
| #NUL!    | #NUL!    | #NUL!    | #NUL!     | #NUL!    | #NUL!      | 1,00      | 1,00     |              |
| 2,00     | 1,00     | 2,00     | 5,00      | 2,00     | 1,00       | 1,00      | 2,00     |              |
| #NUL!    | #NUL!    | 1,00     | 5,00      | 1,00     | 2,00       | 2,00      | 1,00     |              |
| #NUL!    | #NUL!    | #NUL!    | #NUL!     | #NUL!    | #NUL!      | 1,00      | 2,00     |              |
| 2,00     | 2,00     | 1,00     | 3,00      | 2,00     | 1,00       | 2,00      | 2,00     | auccune      |
| 1,00     | 2,00     | 1,00     | 4,00      | 2,00     | 1,00       | 2,00      | 2,00     |              |
| 2,00     | 2,00     | 1,00     | 3,00      | 2,00     | 1,00       | 2,00      | 2,00     |              |
| #NUL!    | #NUL!    | #NUL!    | #NUL!     | #NUL!    | #NUL!      | 1,00      | 2,00     |              |
| 2,00     | #NUL!    | #NUL!    | #NUL!     | 2,00     | #NUL!      | 1,00      | 2,00     |              |
| #NUL!    | #NUL!    | #NUL!    | #NUL!     | #NUL!    | #NUL!      | 1,00      | 1,00     |              |
| 2,00     | #NUL!    | #NUL!    | #NUL!     | 1,00     | 2,00       | 1,00      | 1,00     |              |
| 2,00     | #NUL!    | 2,00     | 3,00      | 2,00     | 1,00       | 1,00      | 1,00     | metroraag    |
| 2,00     | #NUL!    | #NUL!    | #NUL!     | #NUL!    | 2,00       | 1,00      | 2,00     |              |
| 2,00     | #NUL!    | #NUL!    | #NUL!     | #NUL!    | #NUL!      | 1,00      | 1,00     |              |
| #NUL!    | #NUL!    | #NUL!    | #NUL!     | #NUL!    | #NUL!      | 1,00      | 1,00     |              |



moy\_contr DMPC\_apr RVM\_apre delaidmpc VAR00003

|              |       |       |       |                                                            |
|--------------|-------|-------|-------|------------------------------------------------------------|
|              | #NUL! | #NUL! | #NUL! |                                                            |
| ligature de  | #NUL! | 1,00  | 15,00 |                                                            |
|              | #NUL! | #NUL! | #NUL! |                                                            |
| s trompes    | 2,00  | 2,00  | #NUL! | thrombopenie splenomegalie transfusio 10cp oap en p        |
| iaque        | #NUL! | #NUL! | #NUL! |                                                            |
|              | #NUL! | #NUL! | #NUL! |                                                            |
| ligature trc | #NUL! | 1,00  | #NUL! | ATCD meadows , en 2014, avec dysfonction VG                |
|              | #NUL! | #NUL! | #NUL! | cornarienne, dyslipidémie familiale, plastie du TCG a l'aç |
| LIGATURE     | 2,00  | 1,00  | 8,00  |                                                            |
|              | #NUL! | #NUL! | #NUL! |                                                            |
|              | #NUL! | #NUL! | #NUL! |                                                            |
|              | #NUL! | #NUL! | #NUL! |                                                            |
| estatit      | #NUL! | #NUL! | #NUL! |                                                            |
| ligature     | #NUL! | #NUL! | #NUL! |                                                            |
| ure trompe   | #NUL! | #NUL! | #NUL! |                                                            |
|              | #NUL! | #NUL! | #NUL! | dilatation pulmonaire pour RP serré valvulaire, Gmax 8!    |
| auccun       | #NUL! | #NUL! | #NUL! |                                                            |
|              | #NUL! | #NUL! | #NUL! | tombé enceinte apres deux ans (2017, avec RM serré )       |
| ligature trc | 2,00  | 1,00  | 8,00  |                                                            |
|              | 2,00  | 2,00  | #NUL! |                                                            |
|              | 1,00  | #NUL! | 7,00  |                                                            |
|              | 2,00  | 2,00  | #NUL! |                                                            |
| auccun       | #NUL! | #NUL! | #NUL! |                                                            |
| microprogi   | #NUL! | #NUL! | #NUL! |                                                            |
| auccun       | #NUL! | #NUL! | #NUL! |                                                            |
|              | #NUL! | #NUL! | #NUL! |                                                            |
| sterilet     | 1,00  | #NUL! | 12,00 |                                                            |
| calendrier   | 1,00  | #NUL! | 9,00  |                                                            |
| ligature     | #NUL! | #NUL! | #NUL! |                                                            |
|              | #NUL! | #NUL! | #NUL! |                                                            |
| ligature de  | 2,00  | 1,00  | 12,00 |                                                            |
| microprogi   | #NUL! | #NUL! | #NUL! |                                                            |
| calendrier   | 2,00  | 2,00  | #NUL! |                                                            |
| calendrier   | #NUL! | #NUL! | #NUL! |                                                            |
|              | 2,00  | 1,00  | 9,00  |                                                            |
| calendrier   | 1,00  | #NUL! | #NUL! | le jour de la DMPC, RPM souffrance foetale , cesarienne    |
| auccun       | #NUL! | #NUL! | #NUL! |                                                            |
| auccune      | 2,00  | 1,00  | 13,00 |                                                            |
| auccun       | 2,00  | 1,00  | 12,00 |                                                            |
|              | #NUL! | #NUL! | #NUL! |                                                            |
|              | #NUL! | #NUL! | #NUL! |                                                            |
|              | #NUL! | #NUL! | #NUL! |                                                            |
| progetstati  | #NUL! | 1,00  | 15,00 |                                                            |
| progestatif  | 2,00  | 1,00  | 15,00 |                                                            |
| diu/ligatur  | 2,00  | 2,00  | #NUL! |                                                            |
|              | #NUL! | #NUL! | #NUL! |                                                            |
| progestatif  | #NUL! | #NUL! | #NUL! |                                                            |
| ligature trc | #NUL! | #NUL! | #NUL! |                                                            |

|              |       |       |       |
|--------------|-------|-------|-------|
|              | #NUL! | #NUL! | #NUL! |
| ligature     | 2,00  | 1,00  | 6,00  |
| ligature trc | #NUL! | #NUL! | #NUL! |
| auccun       | #NUL! | 1,00  | #NUL! |
|              | #NUL! | #NUL! | #NUL! |
| alvulaire    | #NUL! | #NUL! | #NUL! |
|              | #NUL! | #NUL! | #NUL! |
| calednrier   | #NUL! | #NUL! | #NUL! |
| calendrier   | 1,00  | #NUL! | 12,00 |
| ligature trc | #NUL! | #NUL! | #NUL! |
|              | #NUL! | 1,00  | 12,00 |



ostcesarienne transférée en réanimation , intubé ventil
